# Supplementary material
Source: PubMed Central journal article supplement (PMC6467533)

**Synthesis and in vitro characterization of trehalose-based inhibitors of  
mycobacterial trehalose 6-phosphate phosphatases**

**Sunayana Kapil<sup>‡</sup>, Cecile Petit<sup>‡</sup>, Victoria N. Drago, Donald R. Ronning\* and Steven  
J. Sucheck\*<sup>[a]</sup>**

## Contents:

- S4 <sup>1</sup>H NMR 2,2',3,3',4,4',6'-Hepta-O-benzyl-6-iodo-6-deoxy- $\alpha$ -D-glucopyranosyl-(1 $\rightarrow$ 1)- $\alpha$ -D-glucopyranoside (9)
- S5 <sup>13</sup>C NMR 2,2',3,3',4,4',6'-Hepta-O-benzyl-6-iodo-6-deoxy- $\alpha$ -D-glucopyranosyl-(1 $\rightarrow$ 1)- $\alpha$ -D-glucopyranoside (9)
- S6 <sup>1</sup>H NMR 2,2',3,3',4,4',6'-Hepta-O-benzyl-6-deoxy-6-phosphonate- $\alpha$ -D-glucopyranosyl-(1 $\rightarrow$ 1)- $\alpha$ -D-glucopyranoside (10)
- S7 <sup>13</sup>C NMR 2,2',3,3',4,4',6'-Hepta-O-benzyl-6-deoxy-6-phosphonate- $\alpha$ -D-glucopyranosyl-(1 $\rightarrow$ 1)- $\alpha$ -D-glucopyranoside (10)
- S8 <sup>31</sup>P NMR 2,2',3,3',4,4',6'-Hepta-O-benzyl-6-deoxy-6-phosphonate- $\alpha$ -D-glucopyranosyl-(1 $\rightarrow$ 1)- $\alpha$ -D-glucopyranoside (10)
- S9 <sup>1</sup>H NMR 6-(phosphonic acid)-6-deoxy- $\alpha,\alpha'$ -trehalose (4)
- S10 <sup>13</sup>C NMR 6-(phosphonic acid)-6-deoxy- $\alpha,\alpha'$ -trehalose (4)
- S11 <sup>31</sup>P NMR 6-(phosphonic acid)-6-deoxy- $\alpha,\alpha'$ -trehalose (4)
- S12 <sup>1</sup>H NMR 2,2',3,3',4,4',6'-Hepta-O-benzyl-6-carbaldehyde- $\alpha$ -D-glucopyranosyl-(1 $\rightarrow$ 1)- $\alpha$ -D-glucopyranoside (12)
- S13 <sup>13</sup>C NMR 2,2',3,3',4,4',6'-Hepta-O-benzyl-6-carbaldehyde- $\alpha$ -D-glucopyranosyl-(1 $\rightarrow$ 1)- $\alpha$ -D-glucopyranoside (12)
- S14 <sup>1</sup>H NMR 2,2',3,3',4,4',6'-Hepta-O-benzyl-6-deoxy-6E-(dimethyl vinylphosphonate)- $\alpha,\alpha'$ -trehalose (13)
- S15 <sup>13</sup>C NMR 2,2',3,3',4,4',6'-Hepta-O-benzyl-6-deoxy-6E-(dimethyl vinylphosphonate)- $\alpha,\alpha'$ -trehalose (13)
- S16 <sup>31</sup>P NMR 2,2',3,3',4,4',6'-Hepta-O-benzyl-6-deoxy-6E-(dimethyl vinylphosphonate)- $\alpha,\alpha'$ -trehalose (13)
- S17 <sup>1</sup>H NMR 6-(Methylenephosphonic acid)- $\alpha,\alpha'$ -trehalose (5)
- S18 <sup>13</sup>C NMR 6-(Methylenephosphonic acid)- $\alpha,\alpha'$ -trehalose (5)
- S19 <sup>31</sup>P NMR 6-(Methylenephosphonic acid)- $\alpha,\alpha'$ -trehalose (5)
- S20 <sup>1</sup>H NMR 2,2',3,3',4,4',6'-Hepta-O-benzyl-6-Deoxy-6-azido- $\alpha,\alpha'$ -trehalose (15)
- S21 <sup>13</sup>C NMR 2,2',3,3',4,4',6'-Hepta-O-benzyl-6-Deoxy-6-azido- $\alpha,\alpha'$ -trehalose (15)
- S22 <sup>1</sup>H NMR 2,2',3,3',4,4',6'-Hepta-O-benzyl-6-Deoxy-6-amino- $\alpha,\alpha'$ -trehalose (16)
- S23 <sup>13</sup>C NMR 2,2',3,3',4,4',6'-Hepta-O-benzyl-6-Deoxy-6-amino- $\alpha,\alpha'$ -trehalose (16)
- S24 <sup>1</sup>H NMR 2,2',3,3',4,4',6'-Hepta-O-benzyl-6-Deoxy-6-dibenzylphosphoramidate)- S1  $\alpha,\alpha'$ -trehalose (17)
- S25 <sup>13</sup>C NMR 2,2',3,3',4,4',6'-Hepta-O-benzyl-6-Deoxy-6-dibenzylphosphoramidate)- $\alpha,\alpha'$ -trehalose (17)
- S26 <sup>31</sup>P 2,2',3,3',4,4',6'-Hepta-O-benzyl-6-Deoxy-6-dibenzylphosphoramidate)- $\alpha,\alpha'$ -trehalose (17)
- S27 <sup>1</sup>H NMR 6-(phosphoramidic acid)- $\alpha,\alpha'$ -trehalose (6)
- S28 <sup>13</sup>C NMR 6-(phosphoramidic acid)- $\alpha,\alpha'$ -trehalose (6)
- S29 <sup>31</sup>P NMR 6-(phosphoramidic acid)- $\alpha,\alpha'$ -trehalose (6)
- S30 <sup>1</sup>H NMR 2,2',3,3',4,4',6'-Hepta-O-benzyl-6-deoxy-6-ethynyl- $\alpha,\alpha'$ -trehalose (18)

- S31 <sup>13</sup>C NMR 2,2',3,3',4,4',6'-Hepta-O-benzyl-6-deoxy-6-ethynyl- $\alpha,\alpha'$ -trehalose (18)
- S32 <sup>1</sup>H NMR 2,2',3,3',4,4',6'-Hepta-O-acetyl-6-Deoxy-6-vinyl- $\alpha,\alpha'$ -trehalose (19)
- S33 <sup>13</sup>C NMR 2,2',3,3',4,4',6'-Hepta-O-acetyl-6-Deoxy-6-vinyl- $\alpha,\alpha'$ -trehalose (19)
- S34 <sup>1</sup>H NMR 2,2',3,3',4,4',6'-Hepta-O-acetyl-6-Deoxy-6-oxiranyl- $\alpha,\alpha'$ -trehalose (20)
- S35 <sup>13</sup>C NMR 2,2',3,3',4,4',6'-Hepta-O-acetyl-6-Deoxy-6-oxiranyl- $\alpha,\alpha'$ -trehalose (20)
- S36 <sup>1</sup>H NMR 6-Deoxy-6-oxiranyl- $\alpha,\alpha'$ -trehalose (7)
- S37 <sup>13</sup>C NMR 6-Deoxy-6-oxiranyl- $\alpha,\alpha'$ -trehalose (7)

<sup>1</sup>H NMR 2,2',3,3',4,4',6'-Hepta-O-benzyl-6-iodo-6-deoxy- $\alpha$ -D-glucopyranosyl-(1 $\rightarrow$ 1)- $\alpha$ -D-glucopyranoside (9)

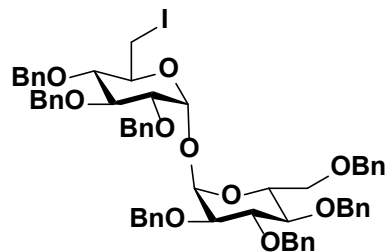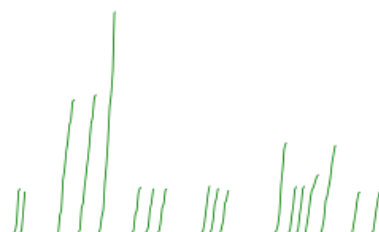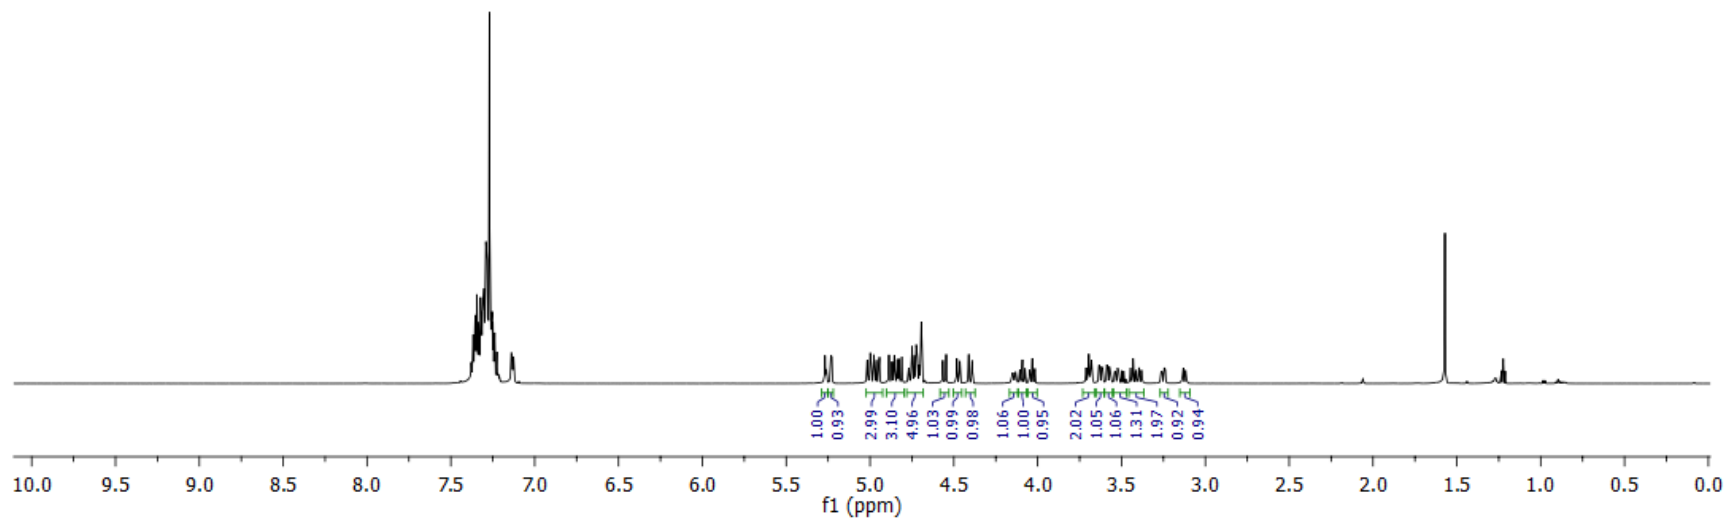

<sup>13</sup>C NMR 2,2',3,3',4,4',6'-Hepta-O-benzyl-6-iodo-6-deoxy- $\alpha$ -D-glucopyranosyl-(1 $\rightarrow$ 1)- $\alpha$ -D-glucopyranoside (9)

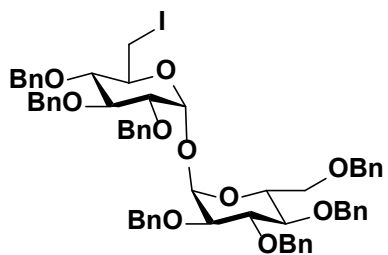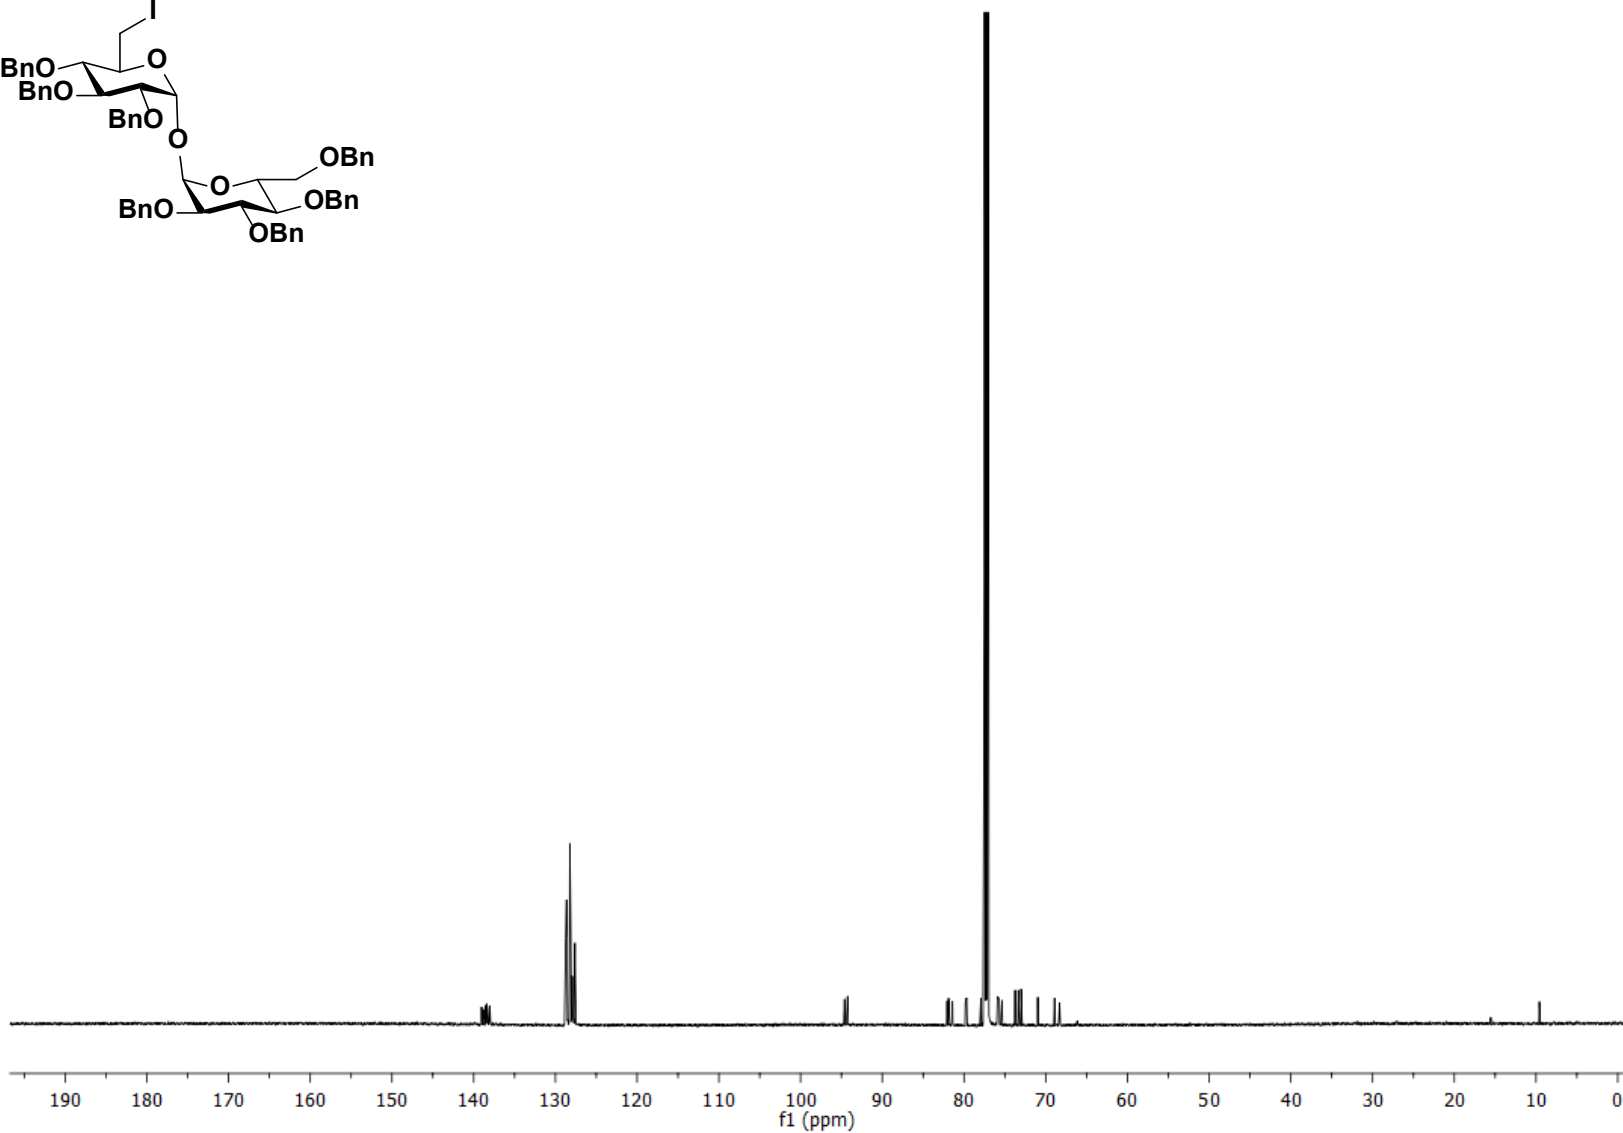

**<sup>1</sup>H NMR 2,2',3,3',4,4',6'-Hepta-O-benzyl-6-deoxy-6-phosphonate- $\alpha$ -D-glucopyranosyl-(1 $\rightarrow$ 1)- $\alpha$ -D-glucopyranoside (10).**

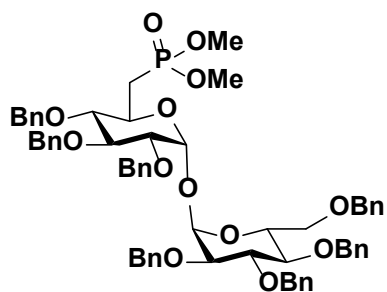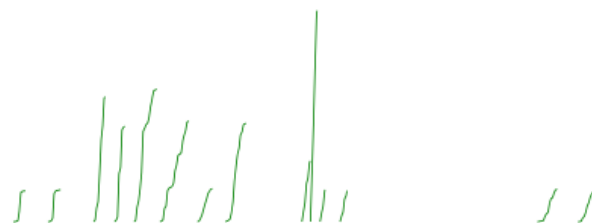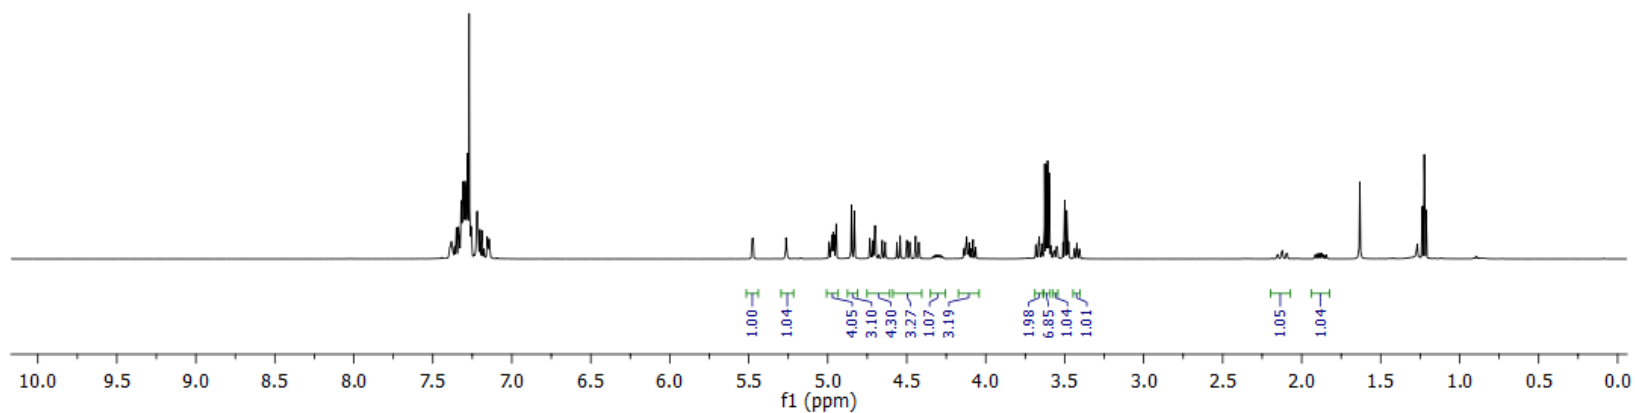

<sup>13</sup>C NMR 2,2',3,3',4,4',6'-Hepta-O-benzyl-6-deoxy-6-phosphonate- $\alpha$ -D-glucopyranosyl-(1 $\rightarrow$ 1)- $\alpha$ -D-glucopyranoside (10)

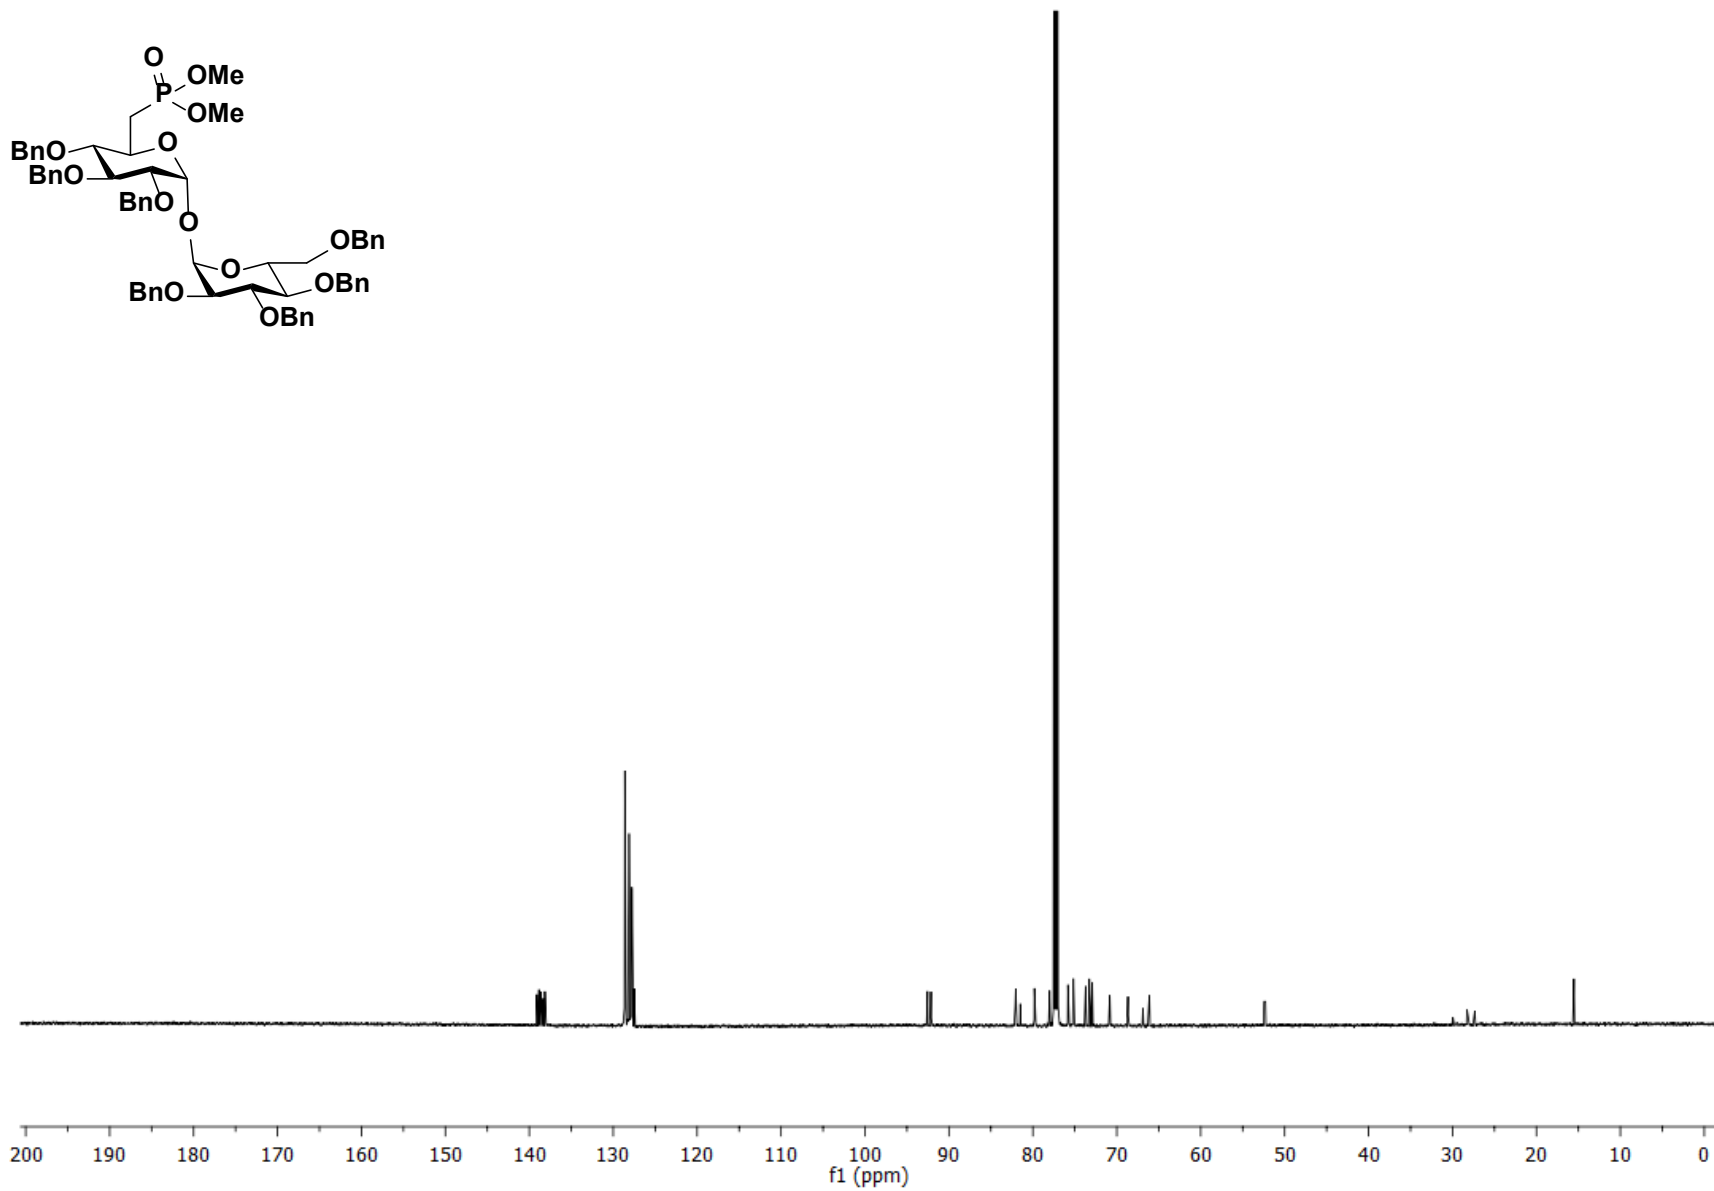

**$^{31}\text{P}$  NMR 2,2',3,3',4,4',6'-Hepta-O-benzyl-6-deoxy-6-phosphonate- $\alpha$ -D-glucopyranosyl-(1 $\rightarrow$ 1)- $\alpha$ -D-glucopyranoside (10)**

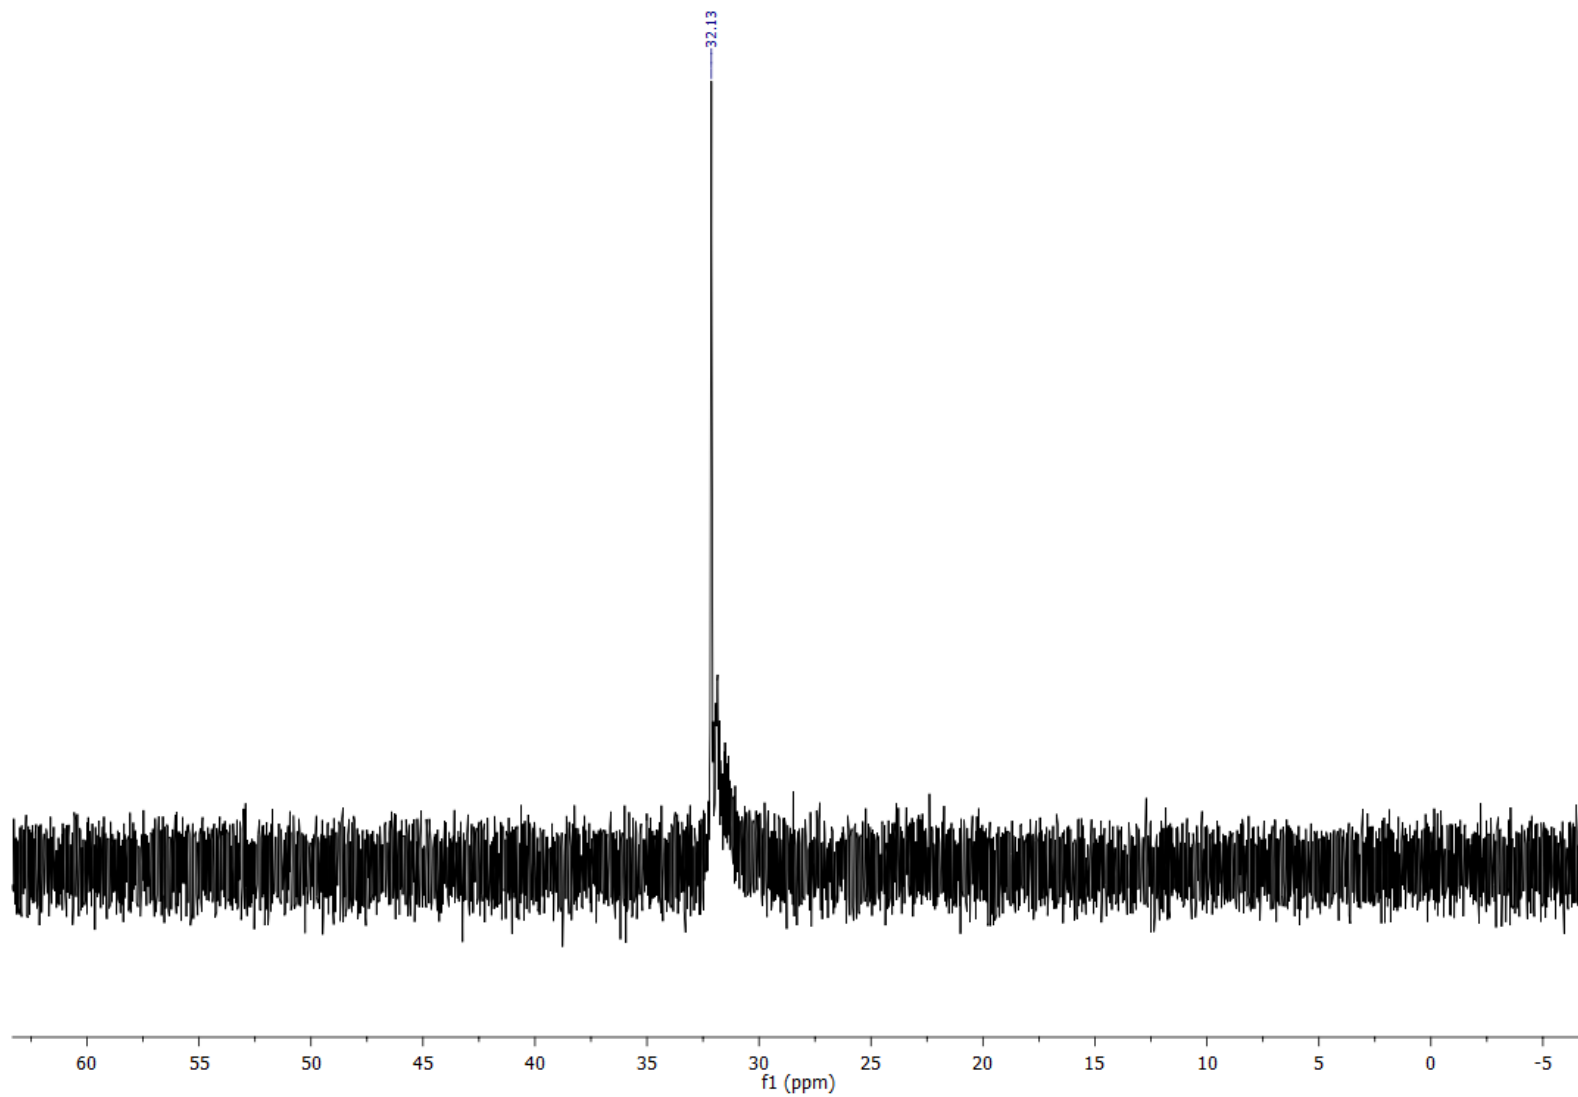



**<sup>1</sup>H NMR 6-(phosphonic acid)-6-deoxy- $\alpha,\alpha'$ -trehalose (4)**

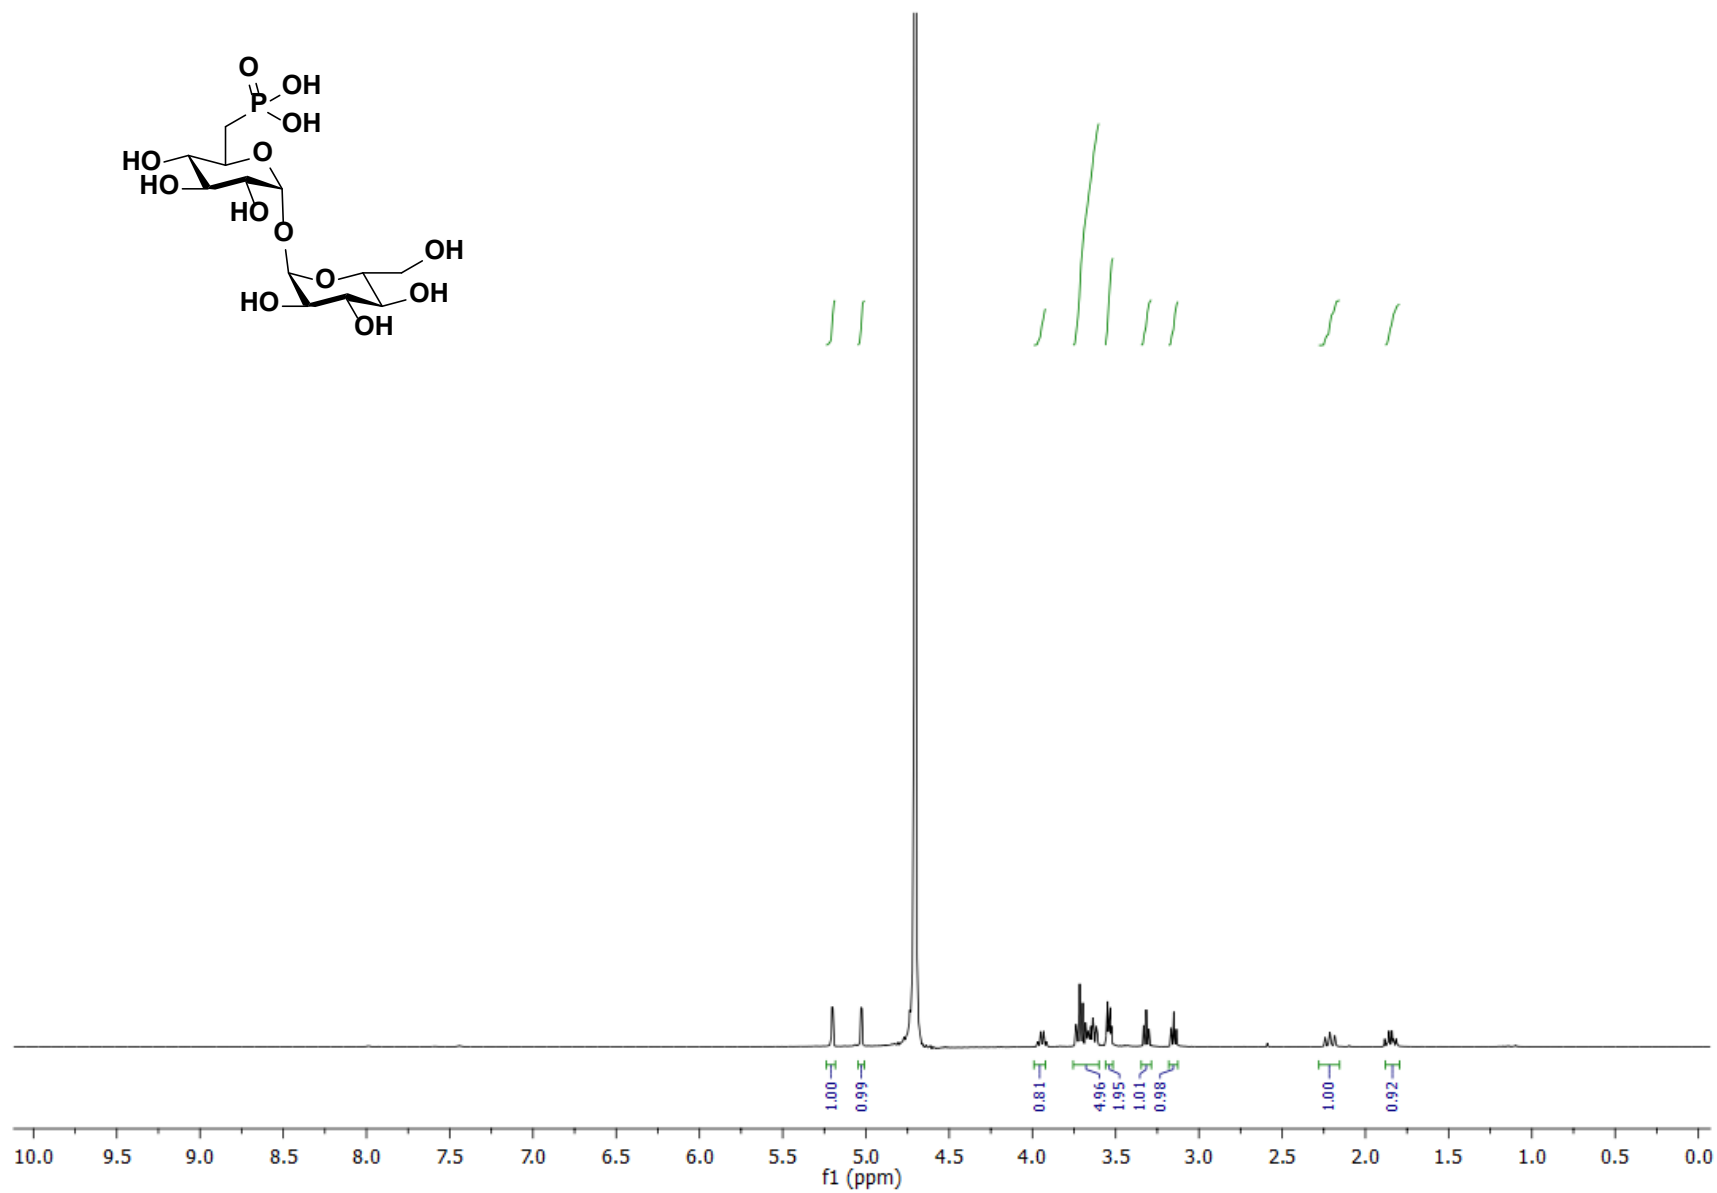

**$^{13}\text{C}$  NMR 6-(phosphonic acid)-6-deoxy- $\alpha,\alpha'$ -trehalose (4)**

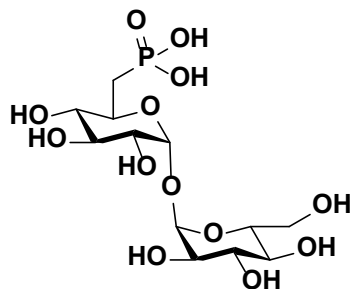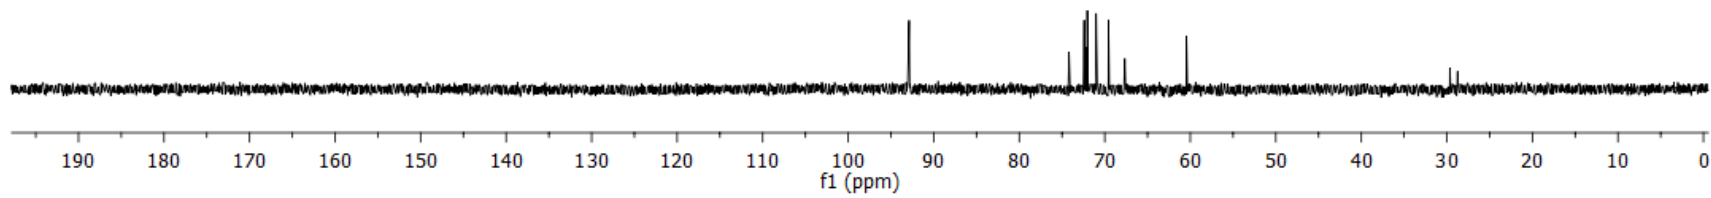

**$^{31}\text{P}$  NMR NMR 6-(phosphonic acid)-6-deoxy- $\alpha,\alpha'$ -trehalose (4)**

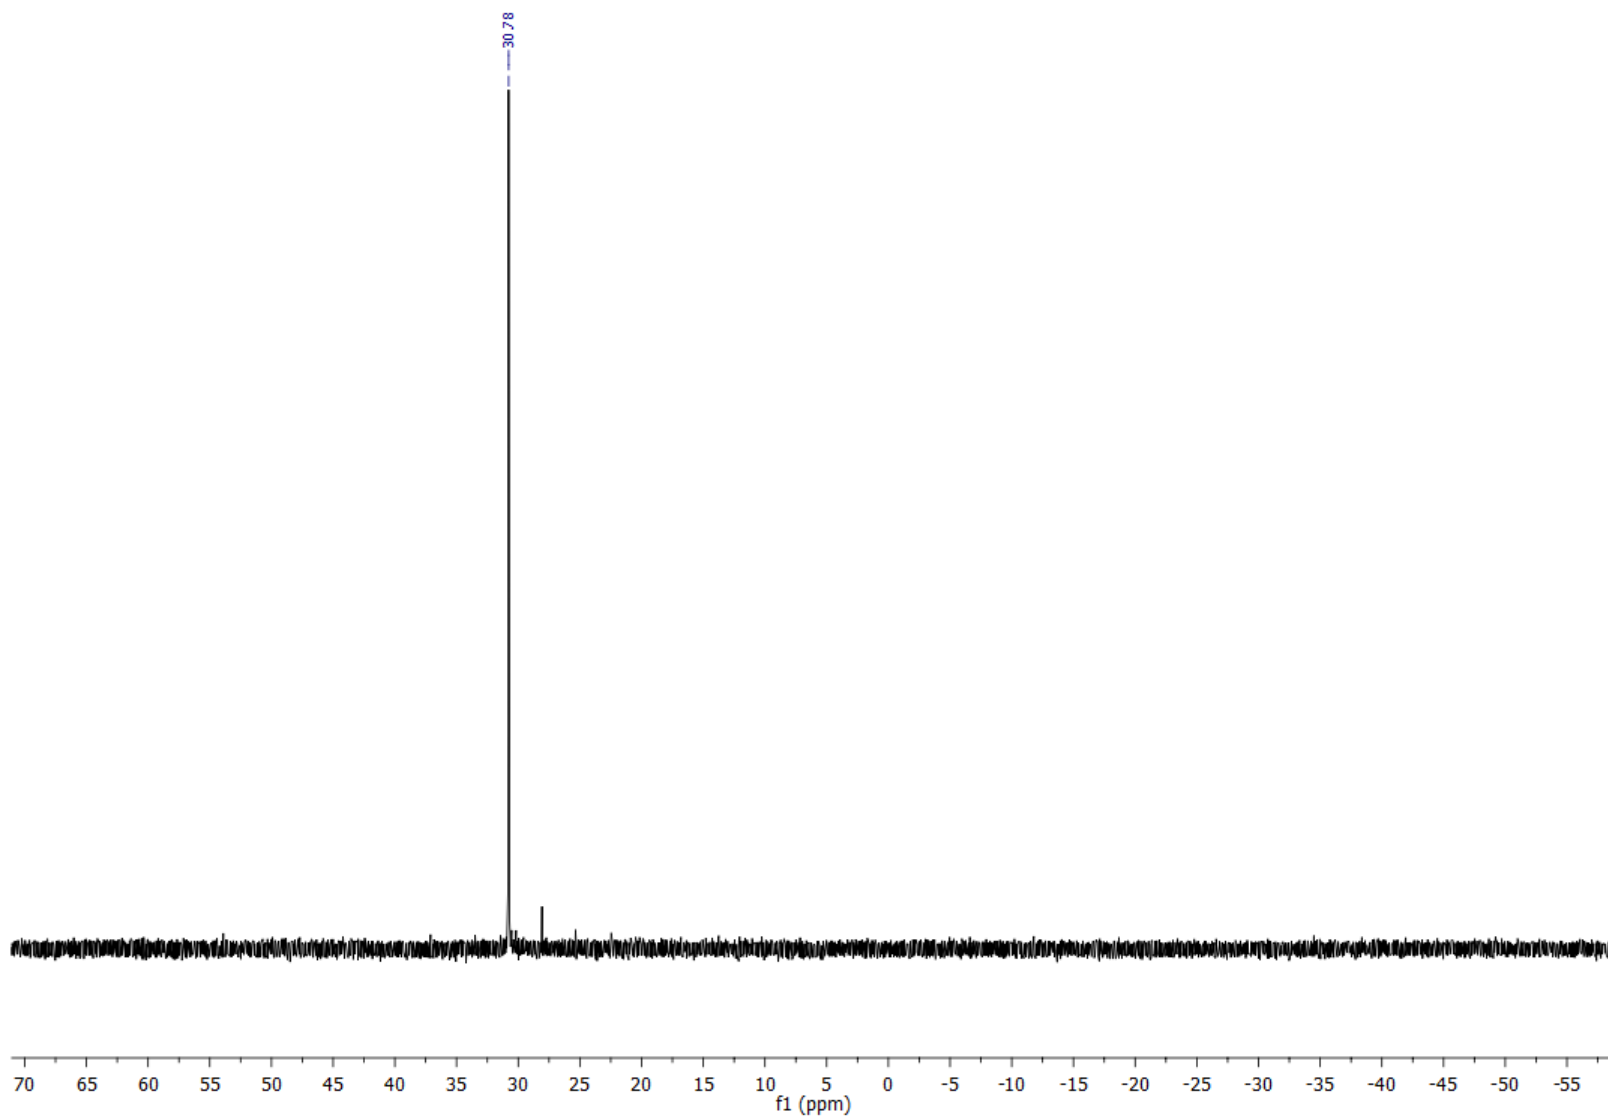

**<sup>1</sup>H NMR 2,2',3,3',4,4',6'-Hepta-O-benzyl-6-carbaldehyde- $\alpha$ -D-glucopyranosyl-(1 $\rightarrow$ 1)- $\alpha$ -D-glucopyranoside (12)**

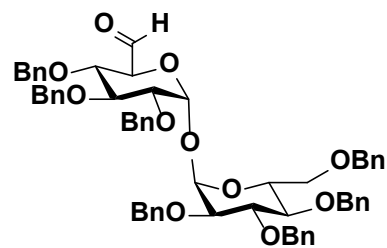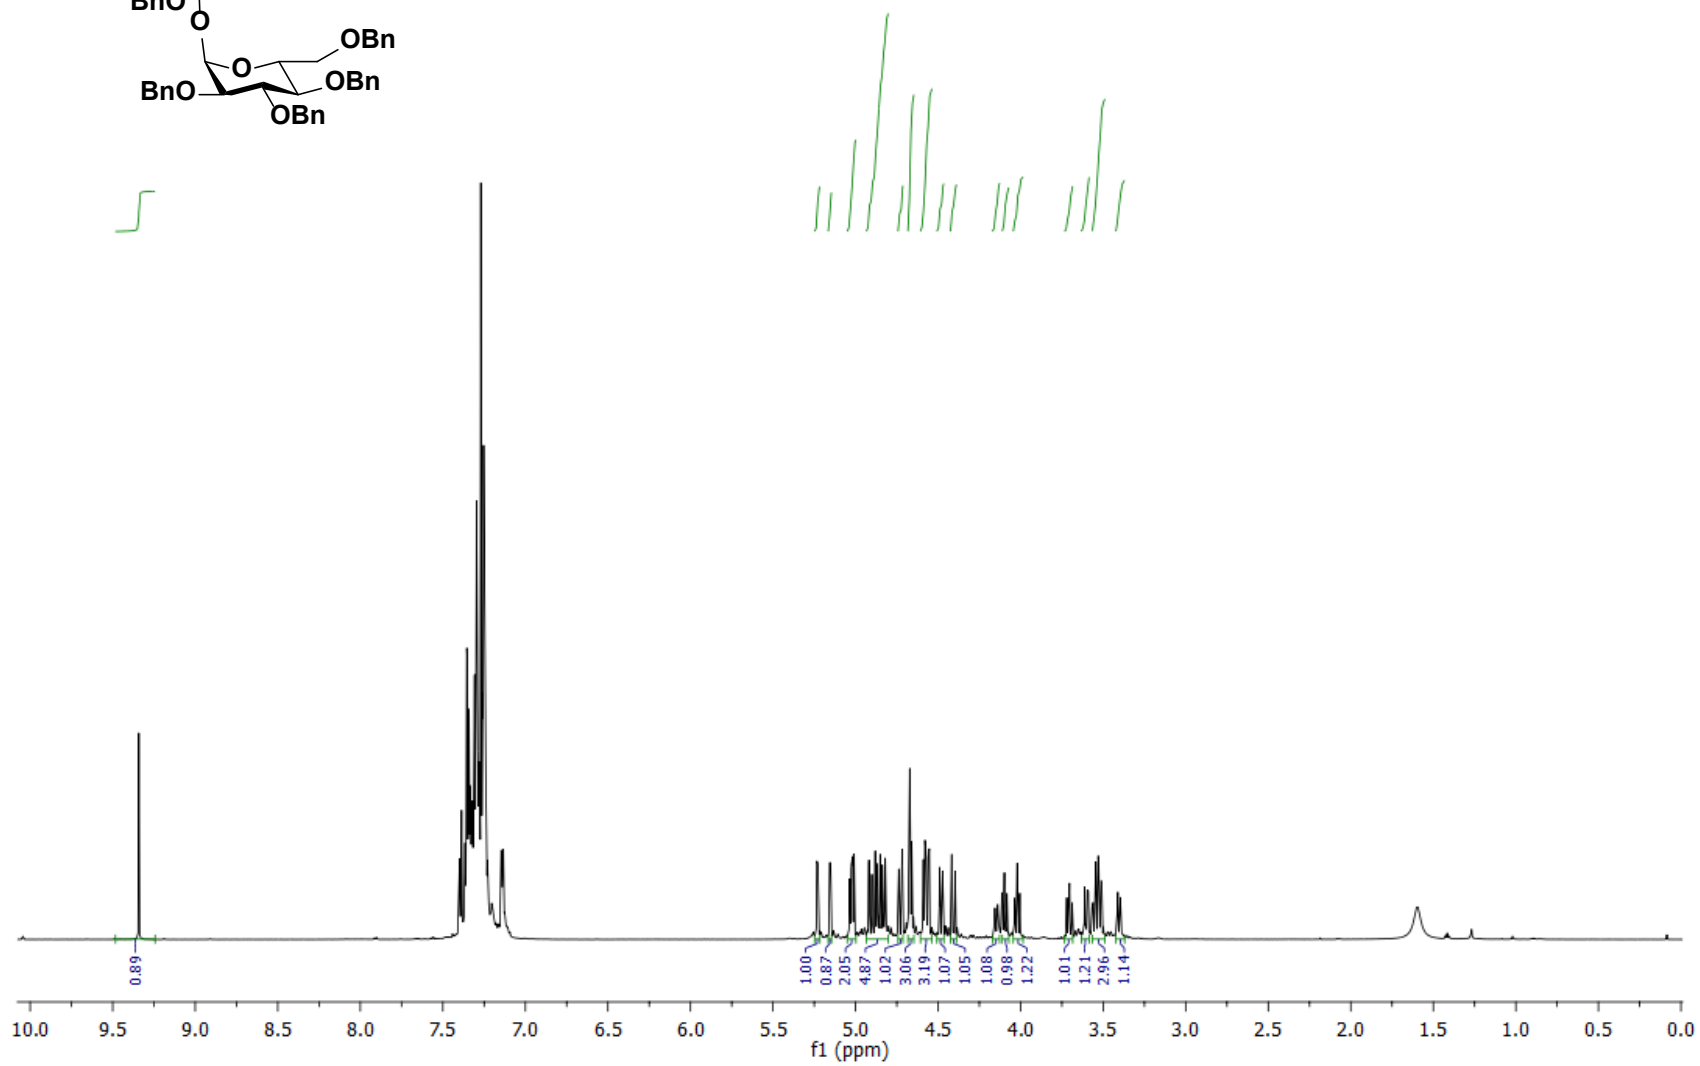

<sup>13</sup>C NMR 2,2',3,3',4,4',6'-Hepta-O-benzyl-6-carbaldehyde-α-D-glucopyranosyl-(1→1)-α-D-glucopyranoside (12)

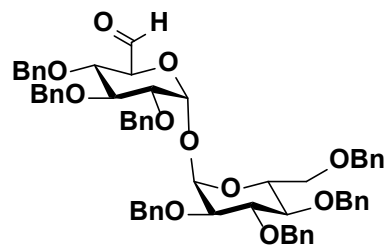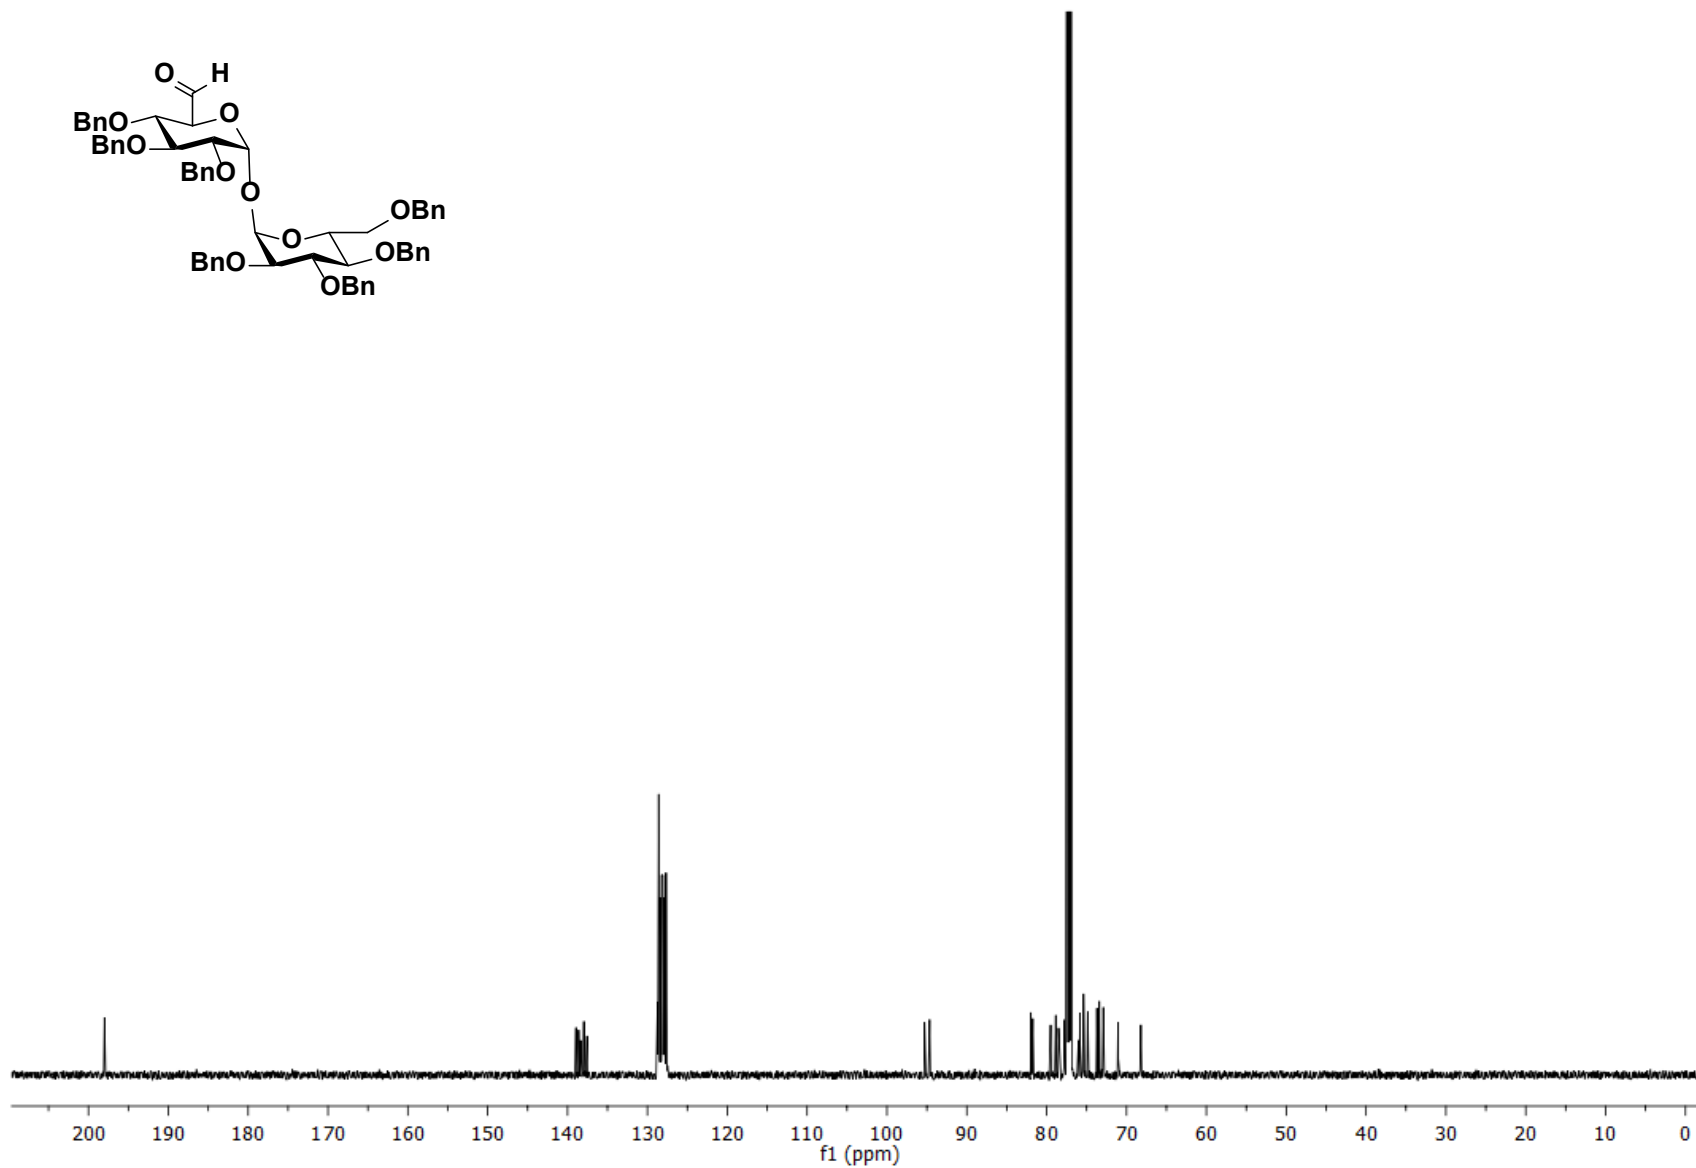

**<sup>1</sup>H NMR 2,2',3,3',4,4',6'-Hepta-O-benzyl-6-deoxy-6E-(dimethyl vinylphosphonate)- $\alpha,\alpha'$ -trehalose (13)**

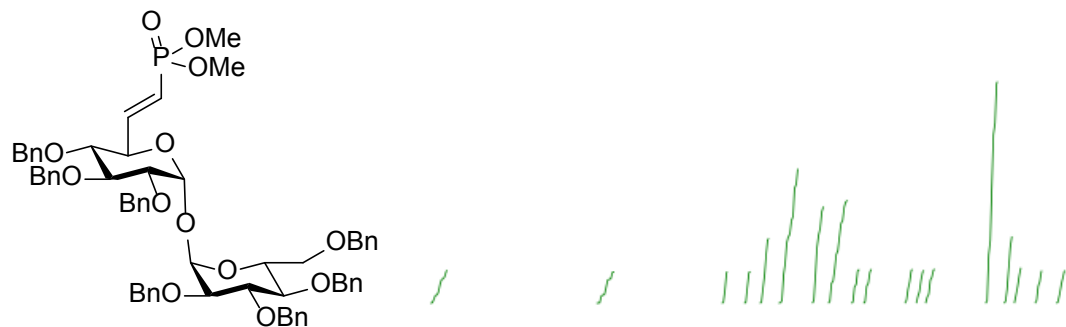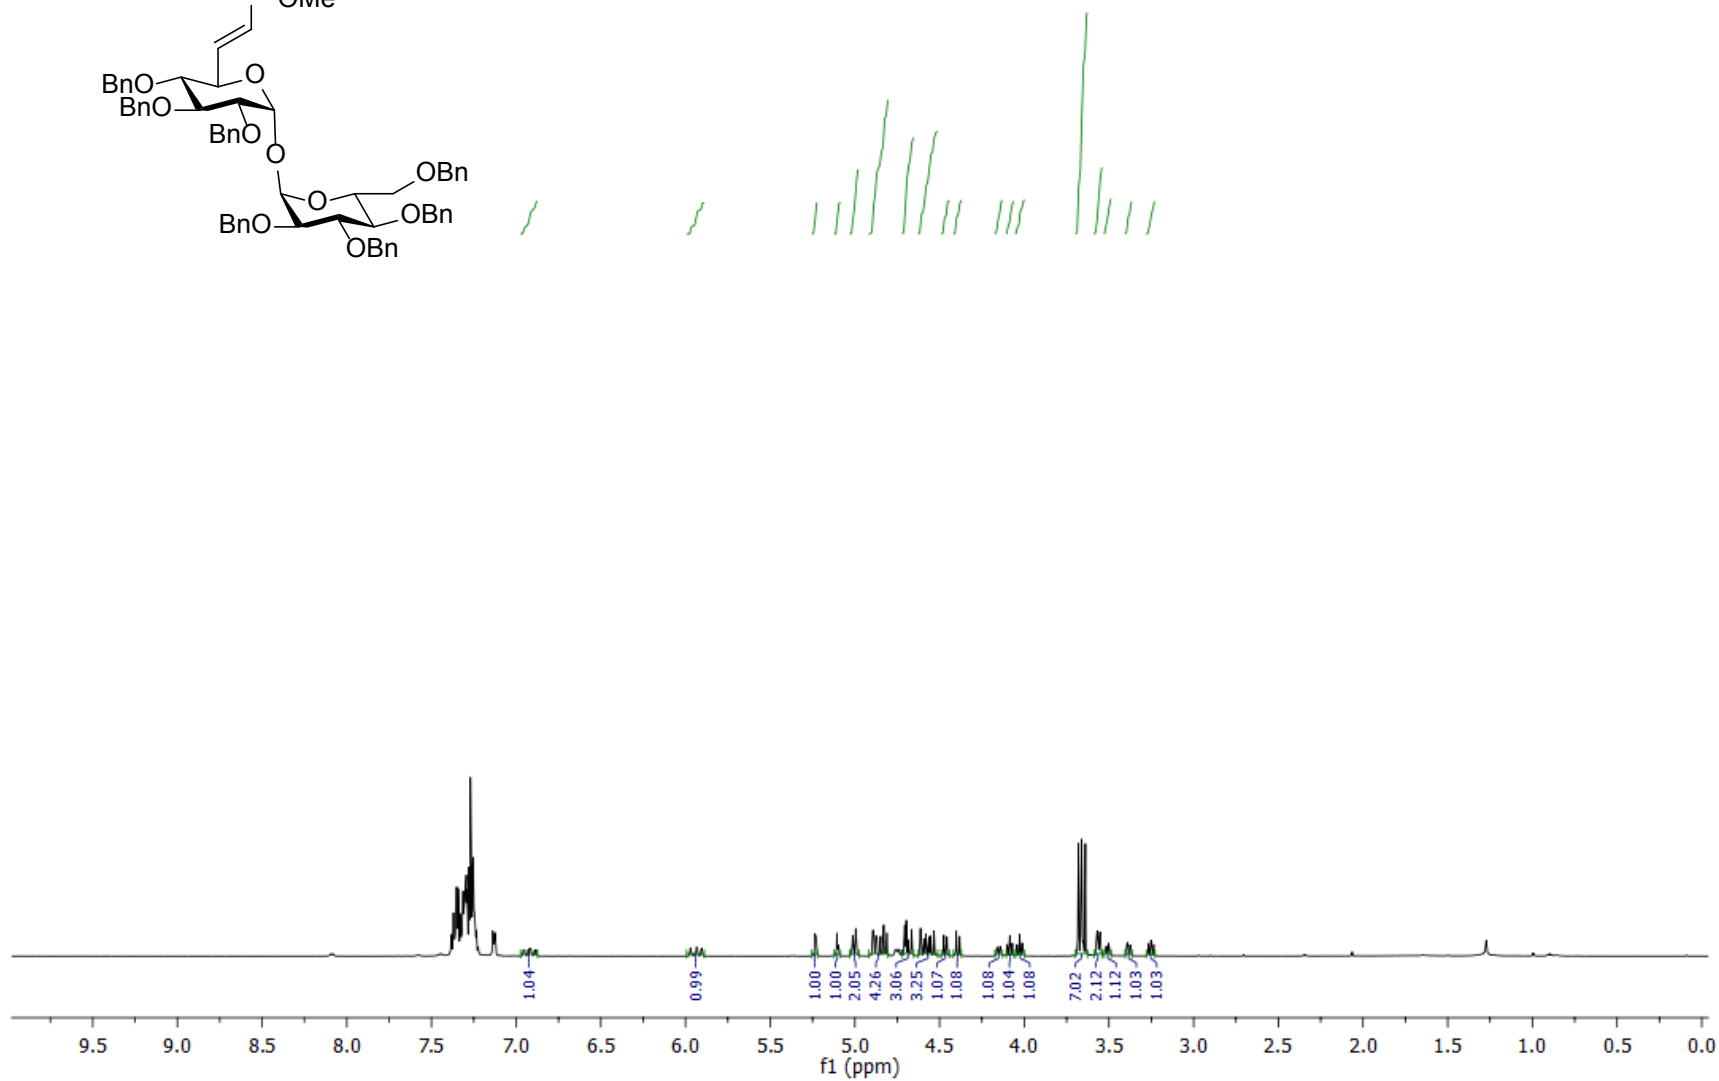

**<sup>13</sup>C NMR 2,2',3,3',4,4',6'-Hepta-O-benzyl-6-deoxy-6*E*-(dimethyl vinylphosphonate)- $\alpha,\alpha'$ -trehalose (13)**

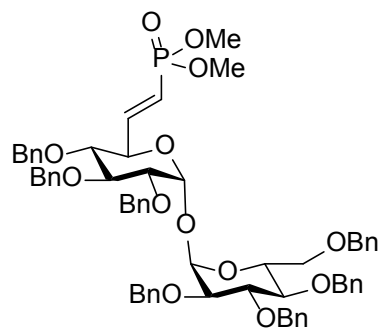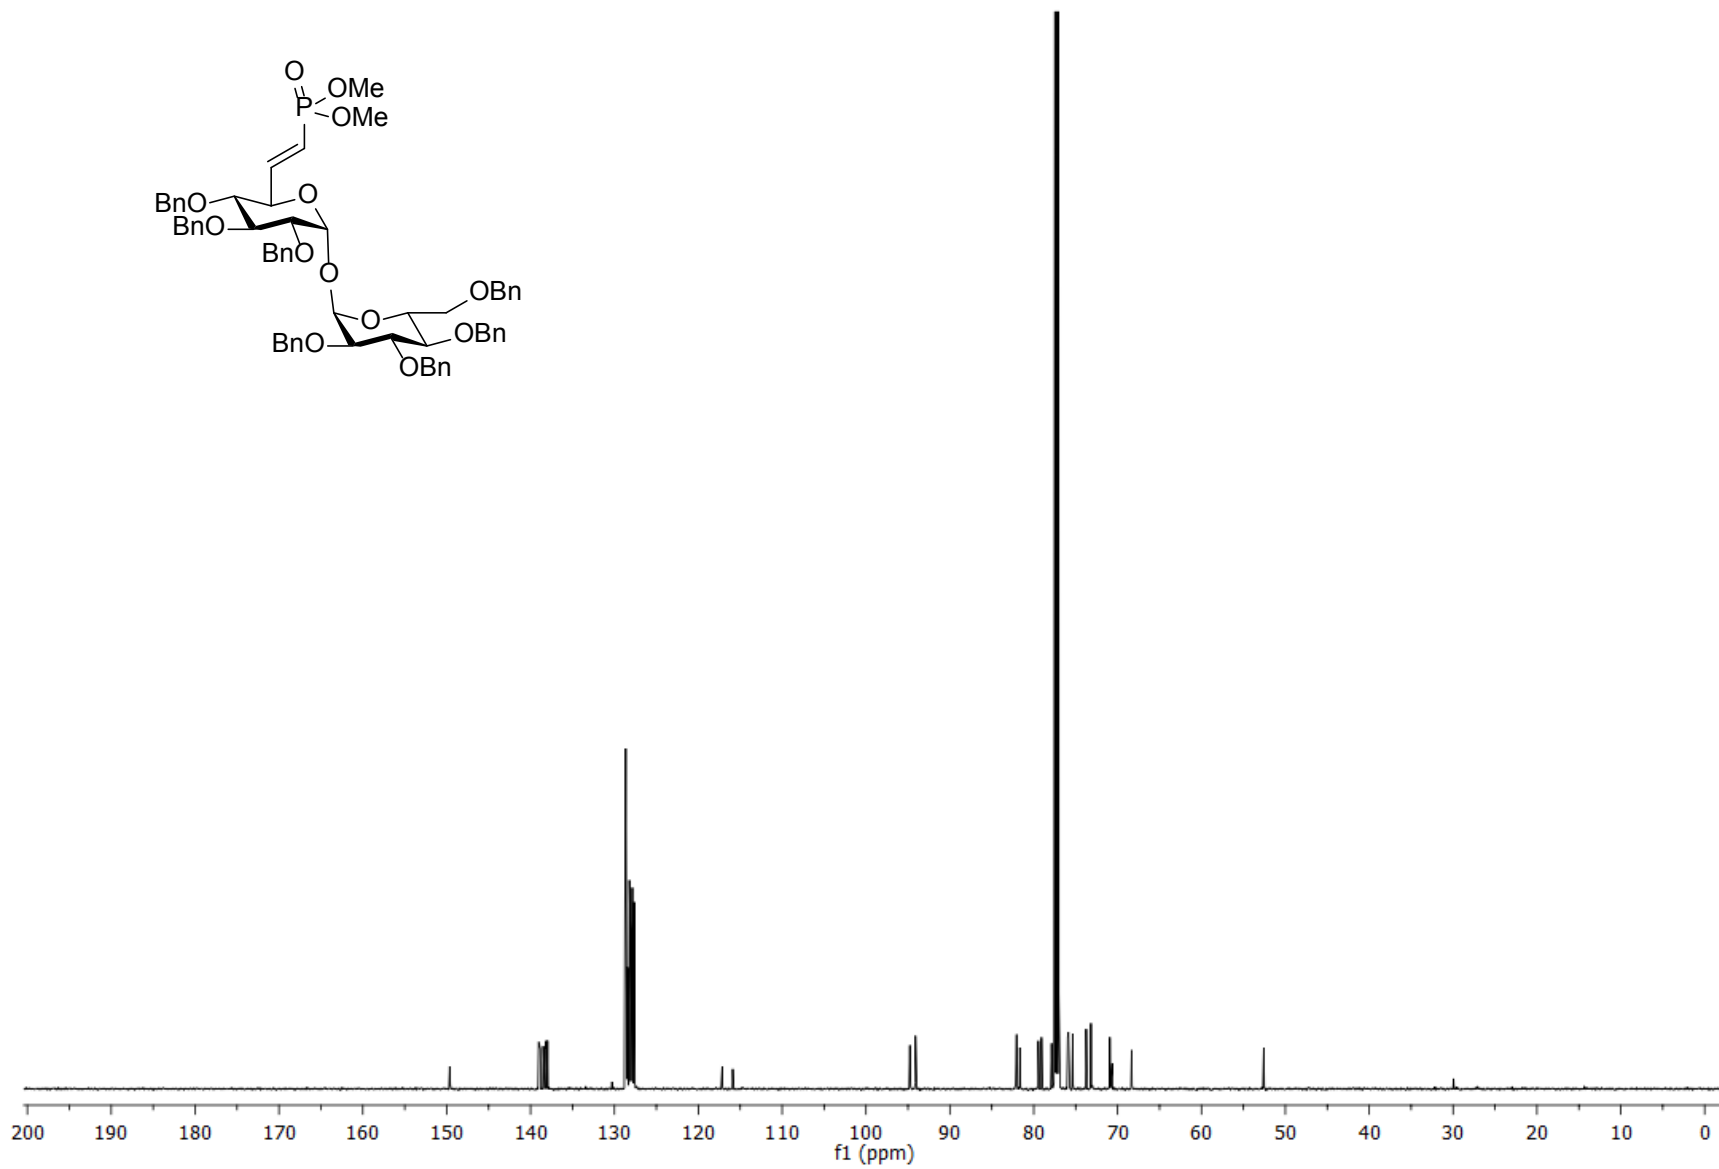

**<sup>31</sup>P NMR 2,2',3,3',4,4',6'-Hepta-O-benzyl-6-deoxy-6E-(dimethyl vinylphosphonate)- $\alpha,\alpha'$ -trehalose (13)**

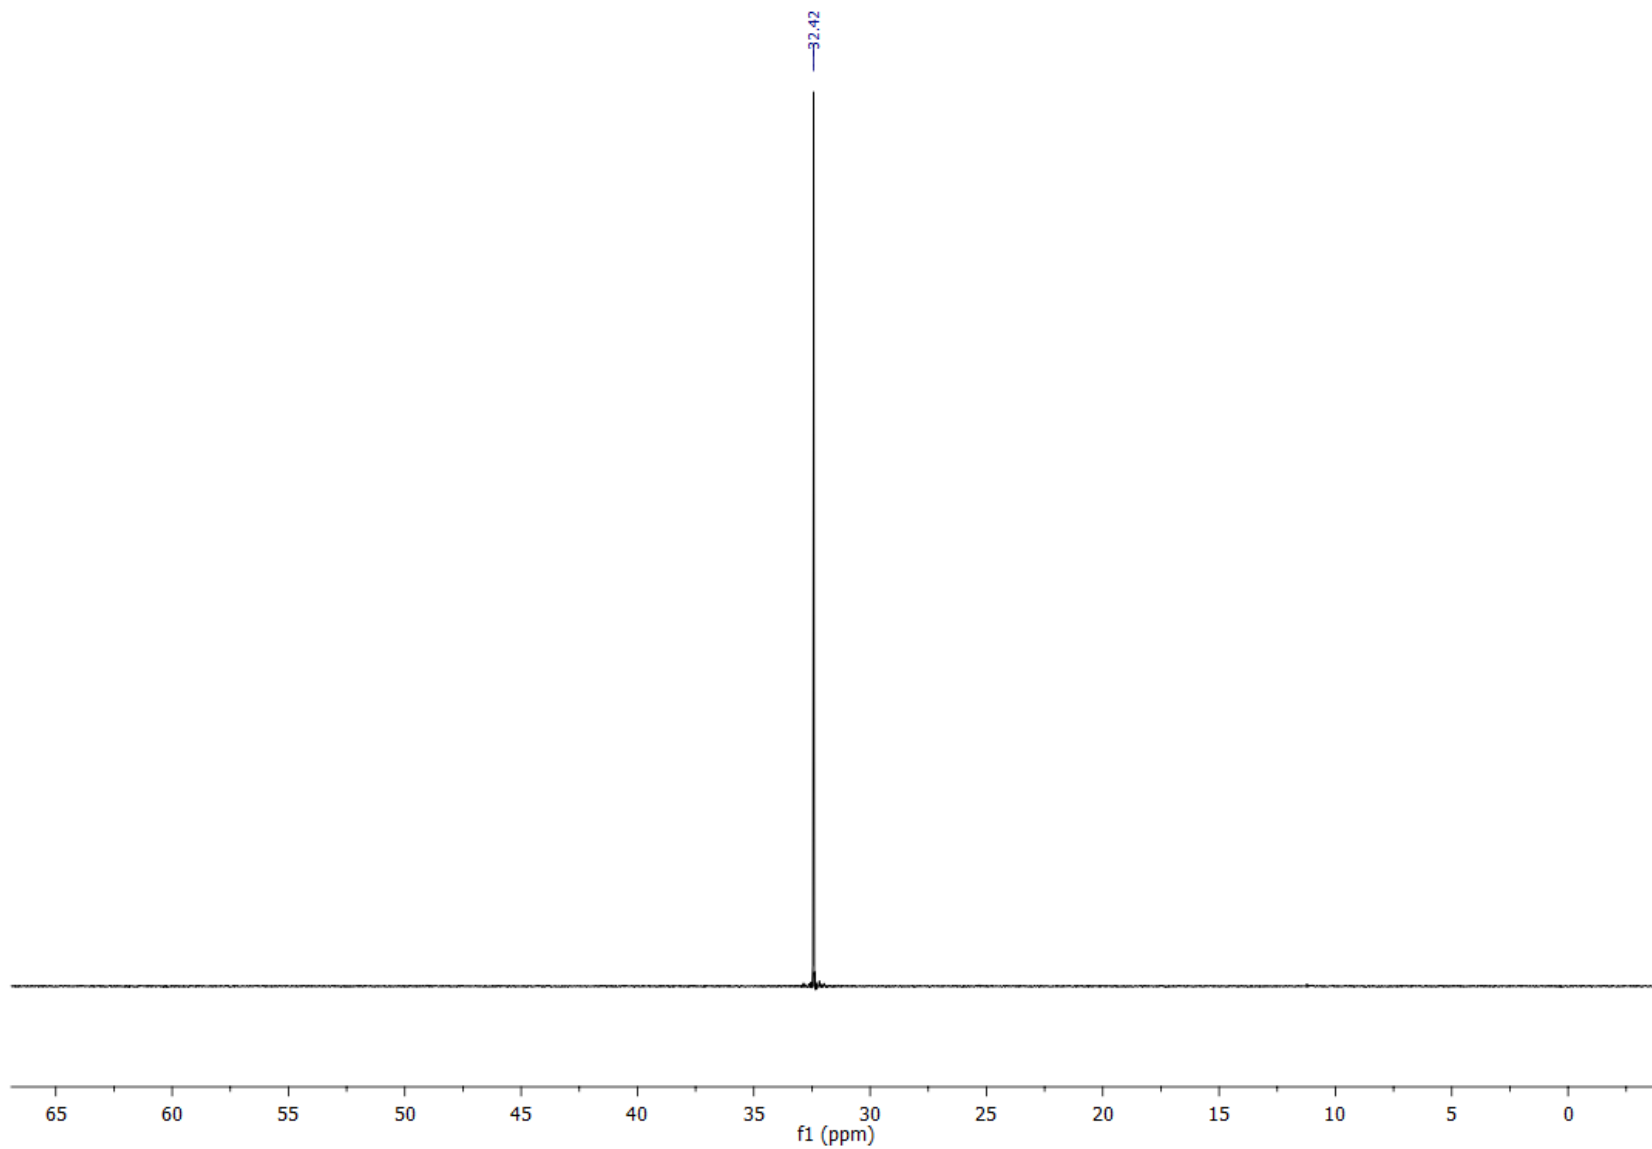



**<sup>1</sup>H NMR 6-(Methylenephosphonic acid)- $\alpha,\alpha'$ -trehalose (5)**

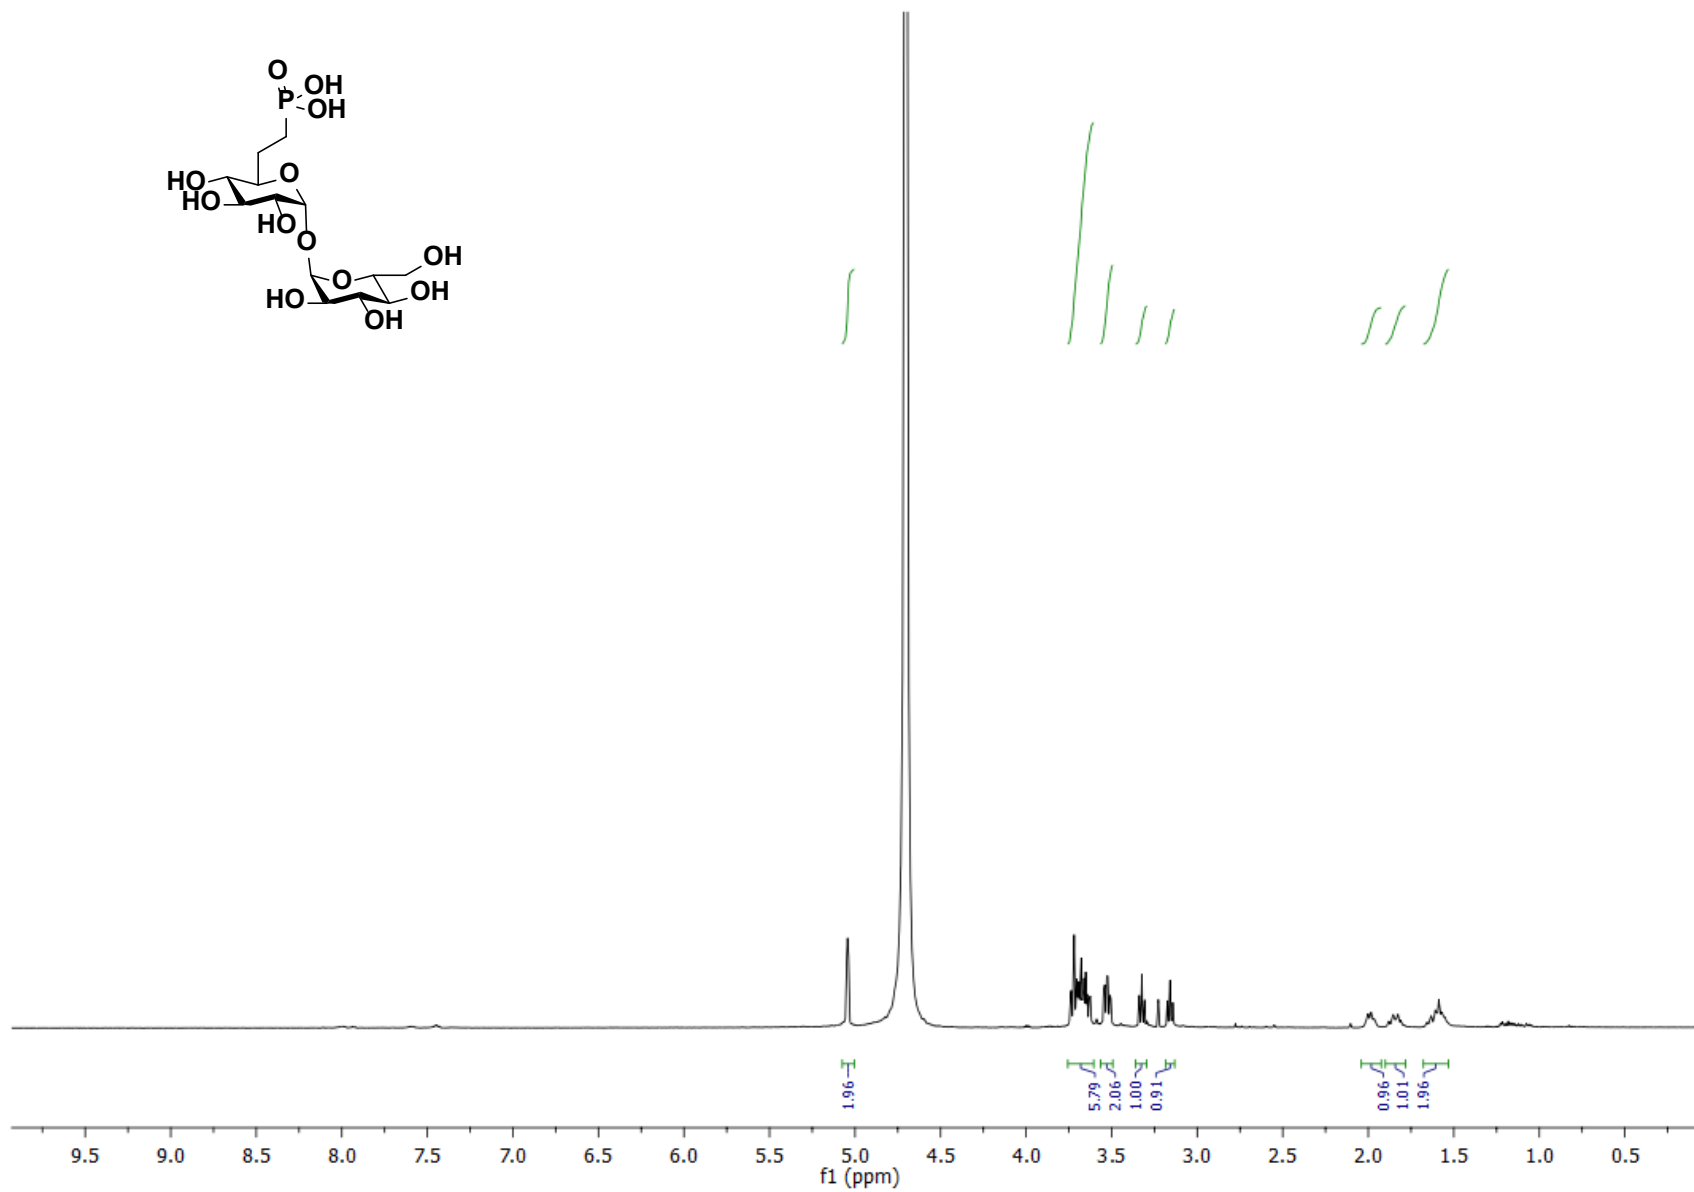

**$^{13}\text{C}$  NMR 6-(Methylenephosphonic acid)- $\alpha,\alpha'$ -trehalose (5)**

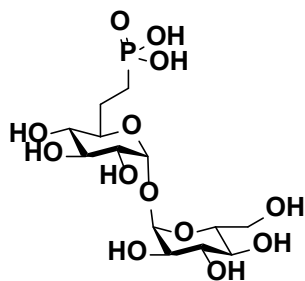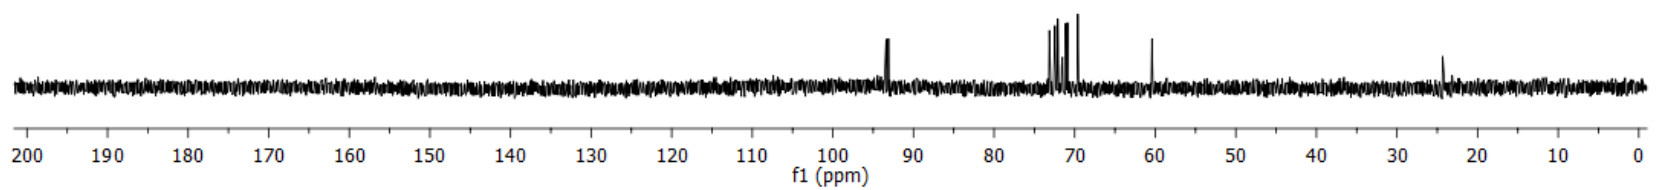

**<sup>31</sup>P NMR 6-(Methylenephosphonic acid)- $\alpha,\alpha'$ -trehalose (5)**

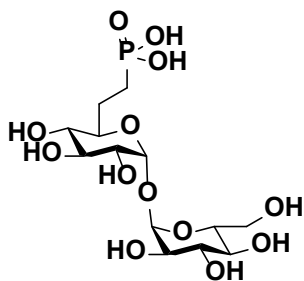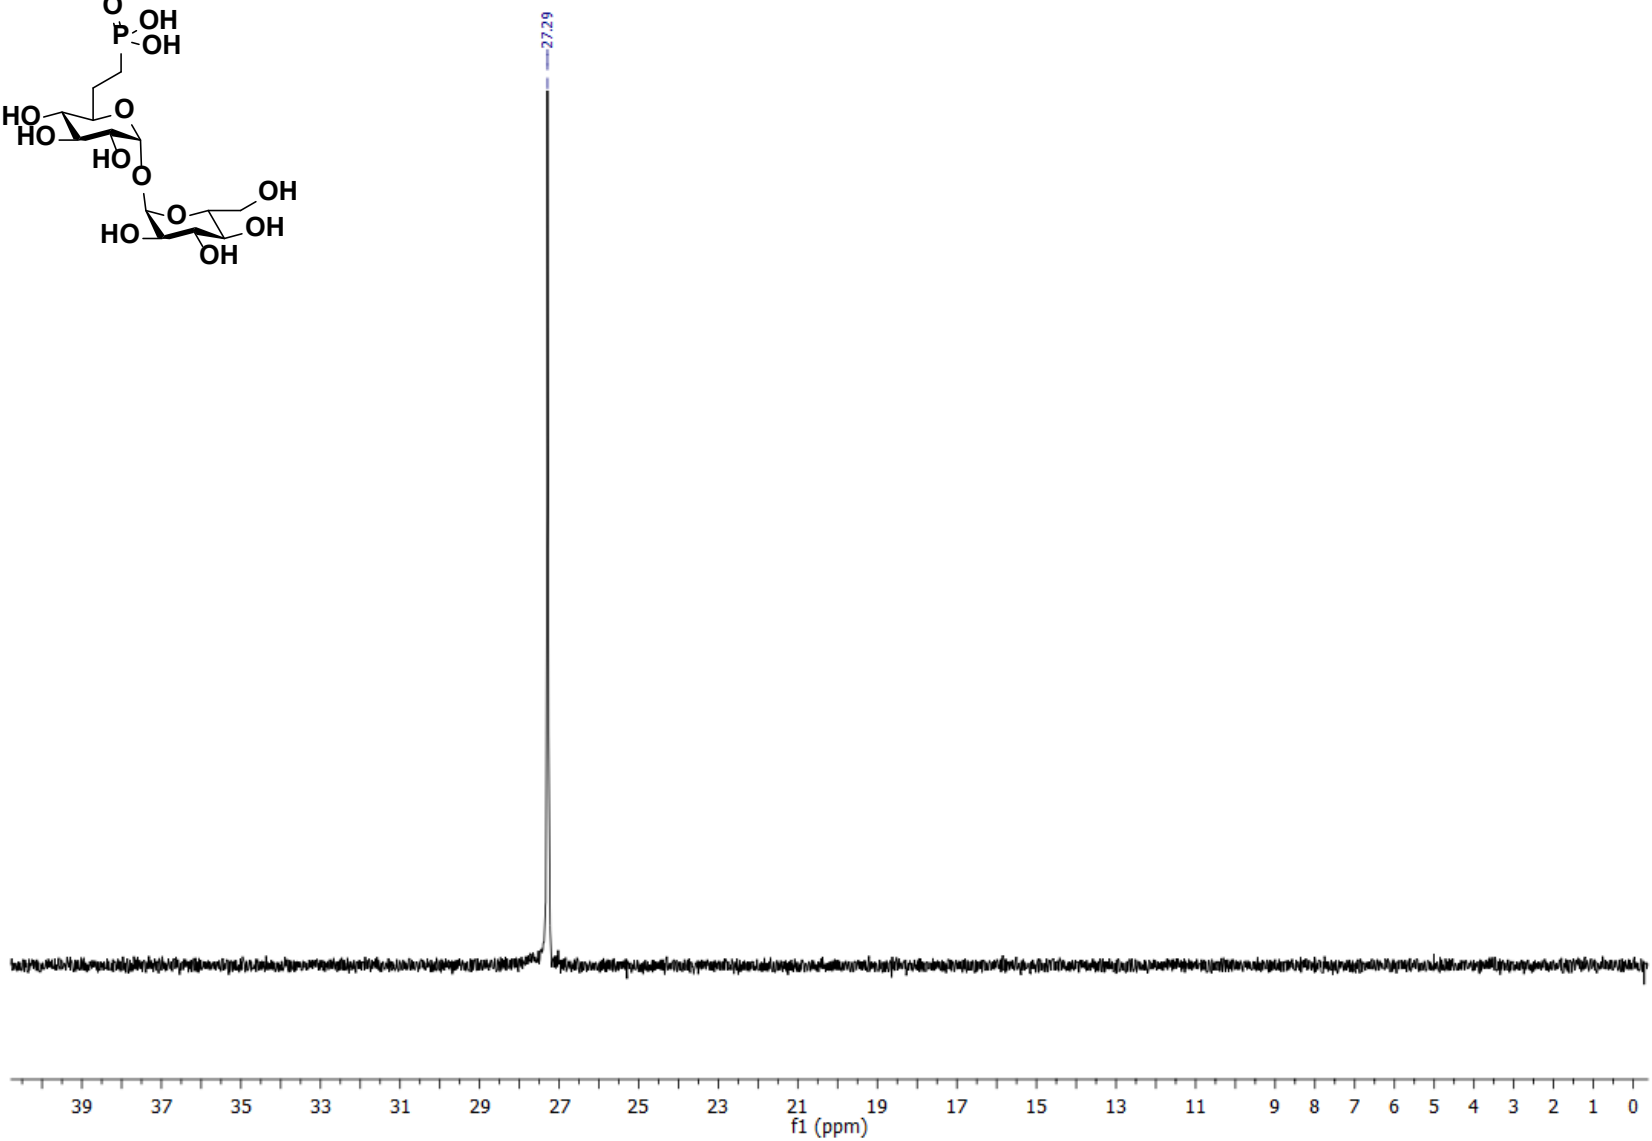

**<sup>1</sup>H NMR 2,2',3,3',4,4',6'-Hepta-O-benzyl-6-Deoxy-6-azido- $\alpha,\alpha'$ -trehalose (15)**

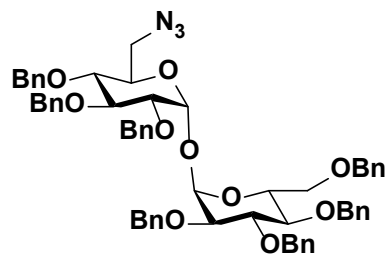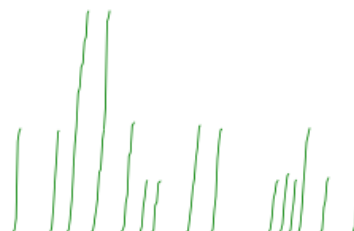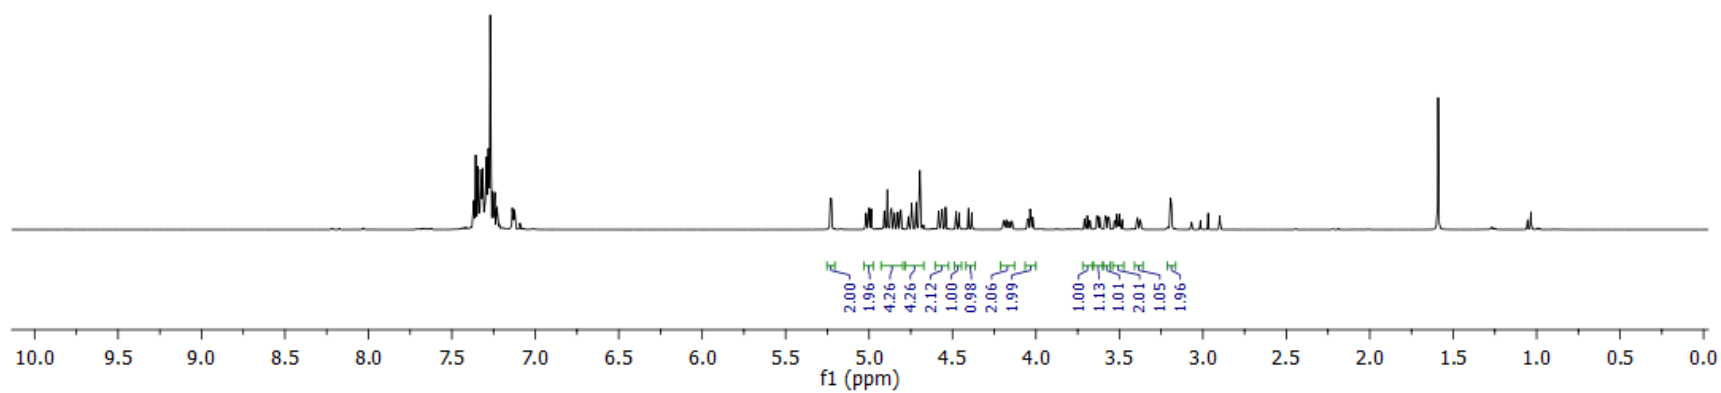



**<sup>1</sup>H NMR 2,2',3,3',4,4',6'-Hepta-O-benzyl-6-Deoxy-6-amino- $\alpha,\alpha'$ -trehalose (16)**

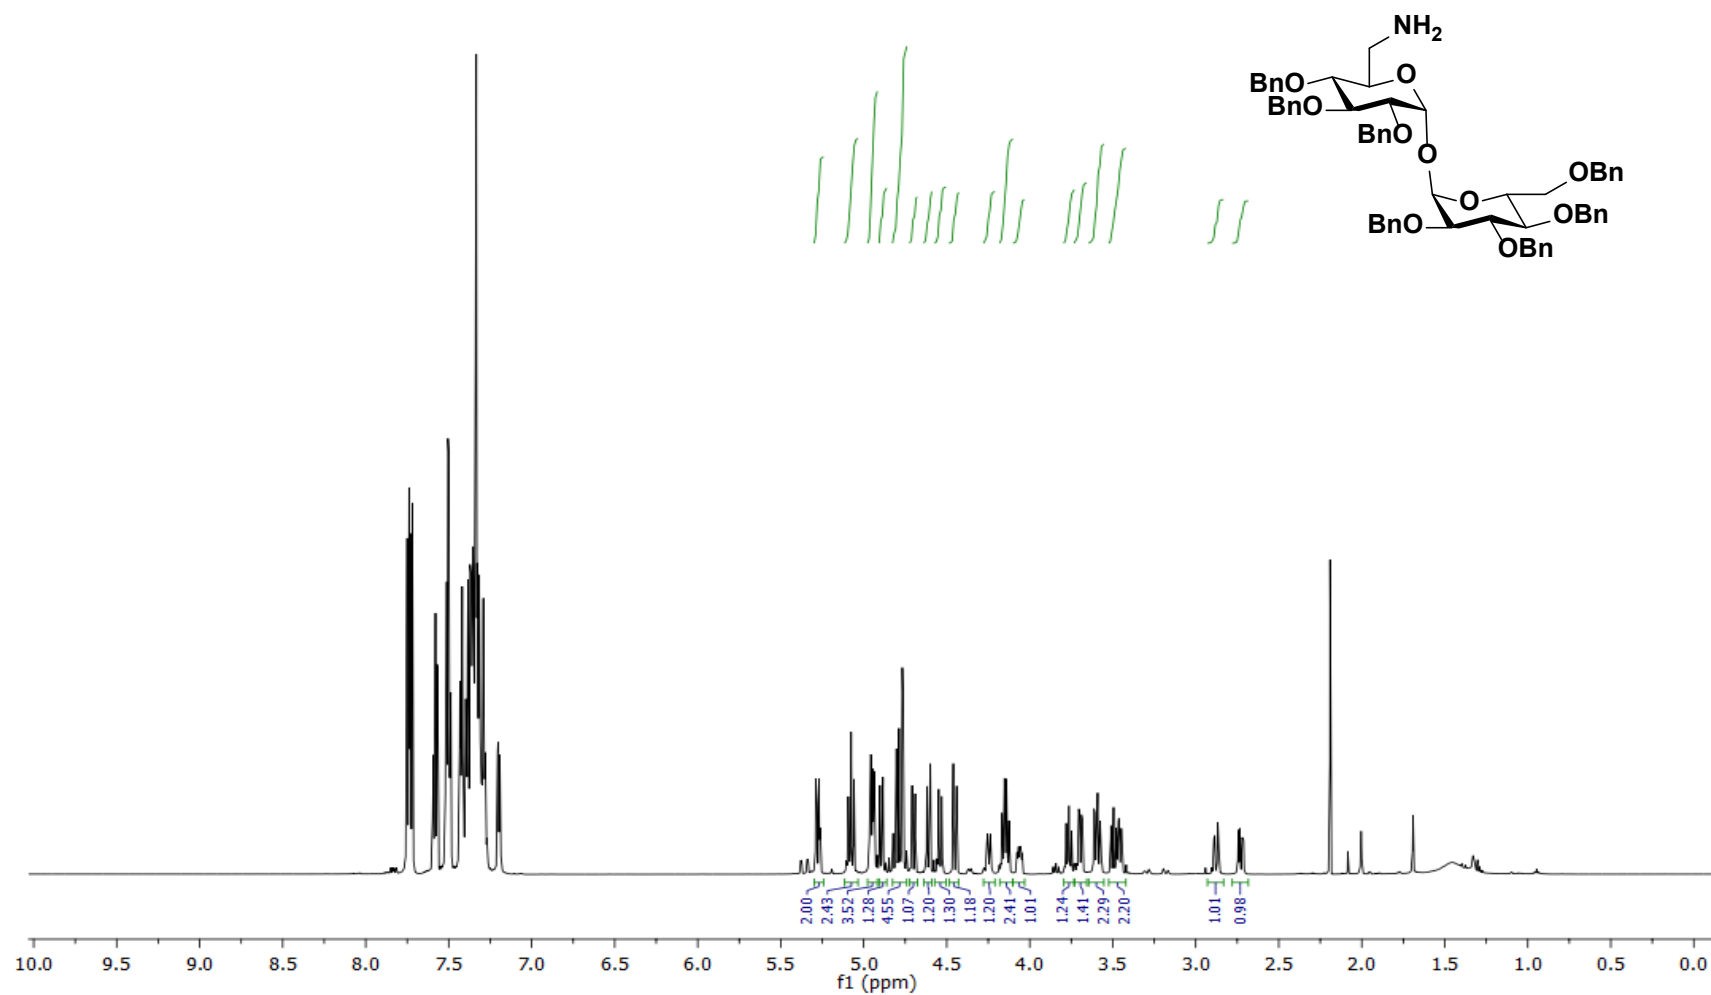

**$^{13}\text{C}$  NMR 2,2',3,3',4,4',6'-Hepta-O-benzyl-6-Deoxy-6-amino- $\alpha,\alpha'$ -trehalose (16)**

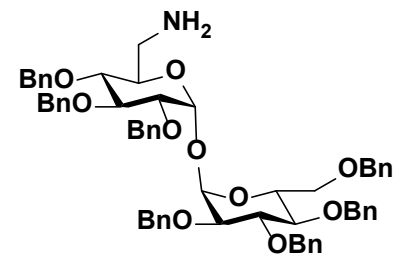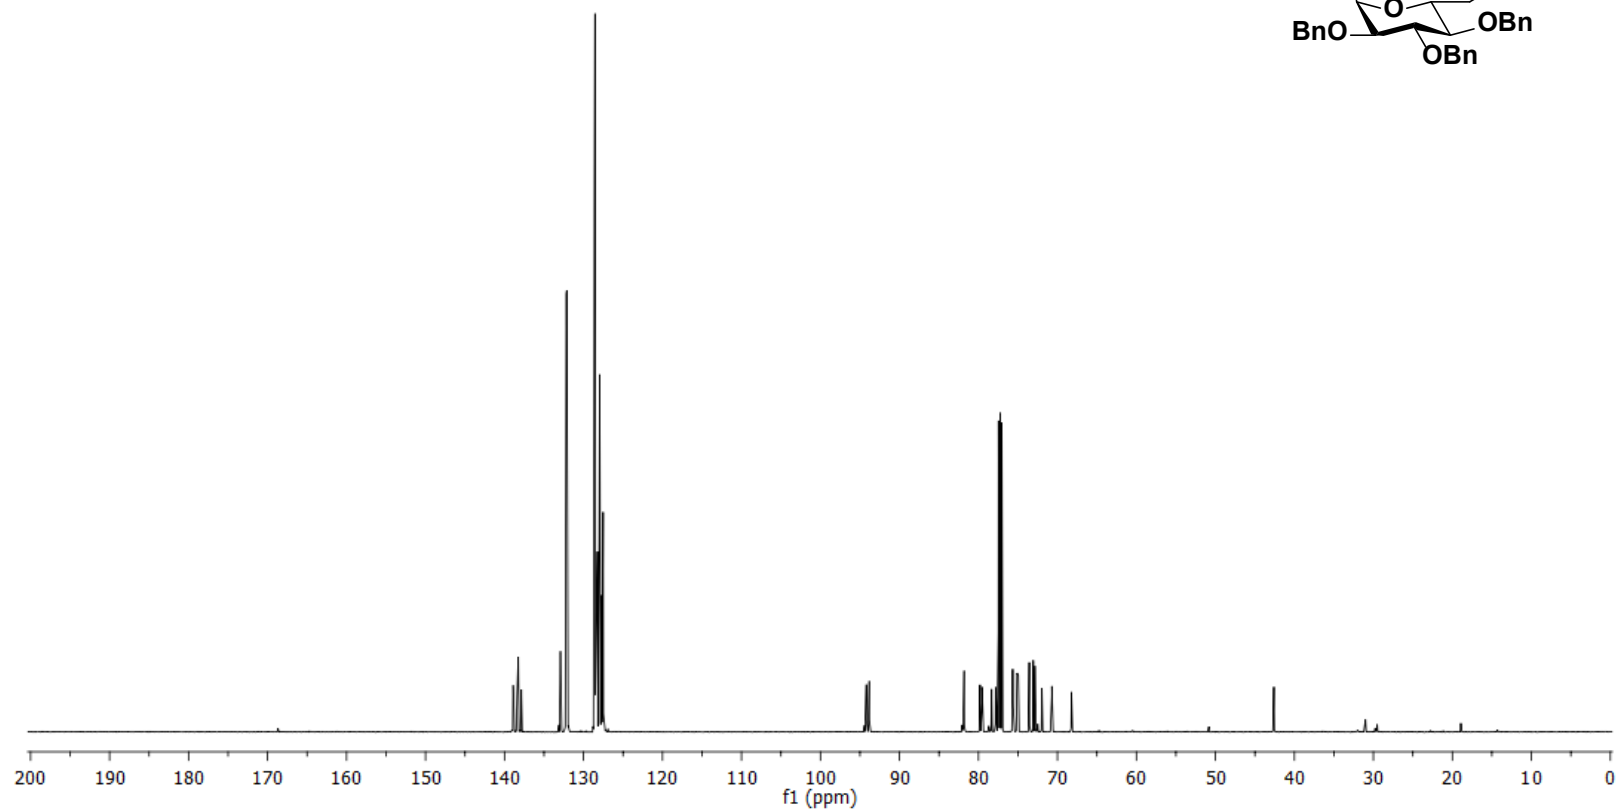

<sup>1</sup>H NMR 2,2',3,3',4,4',6'-Hepta-O-benzyl-6-Deoxy-6-dibenzylphosphoramidate)-α,α'-trehalose (17)

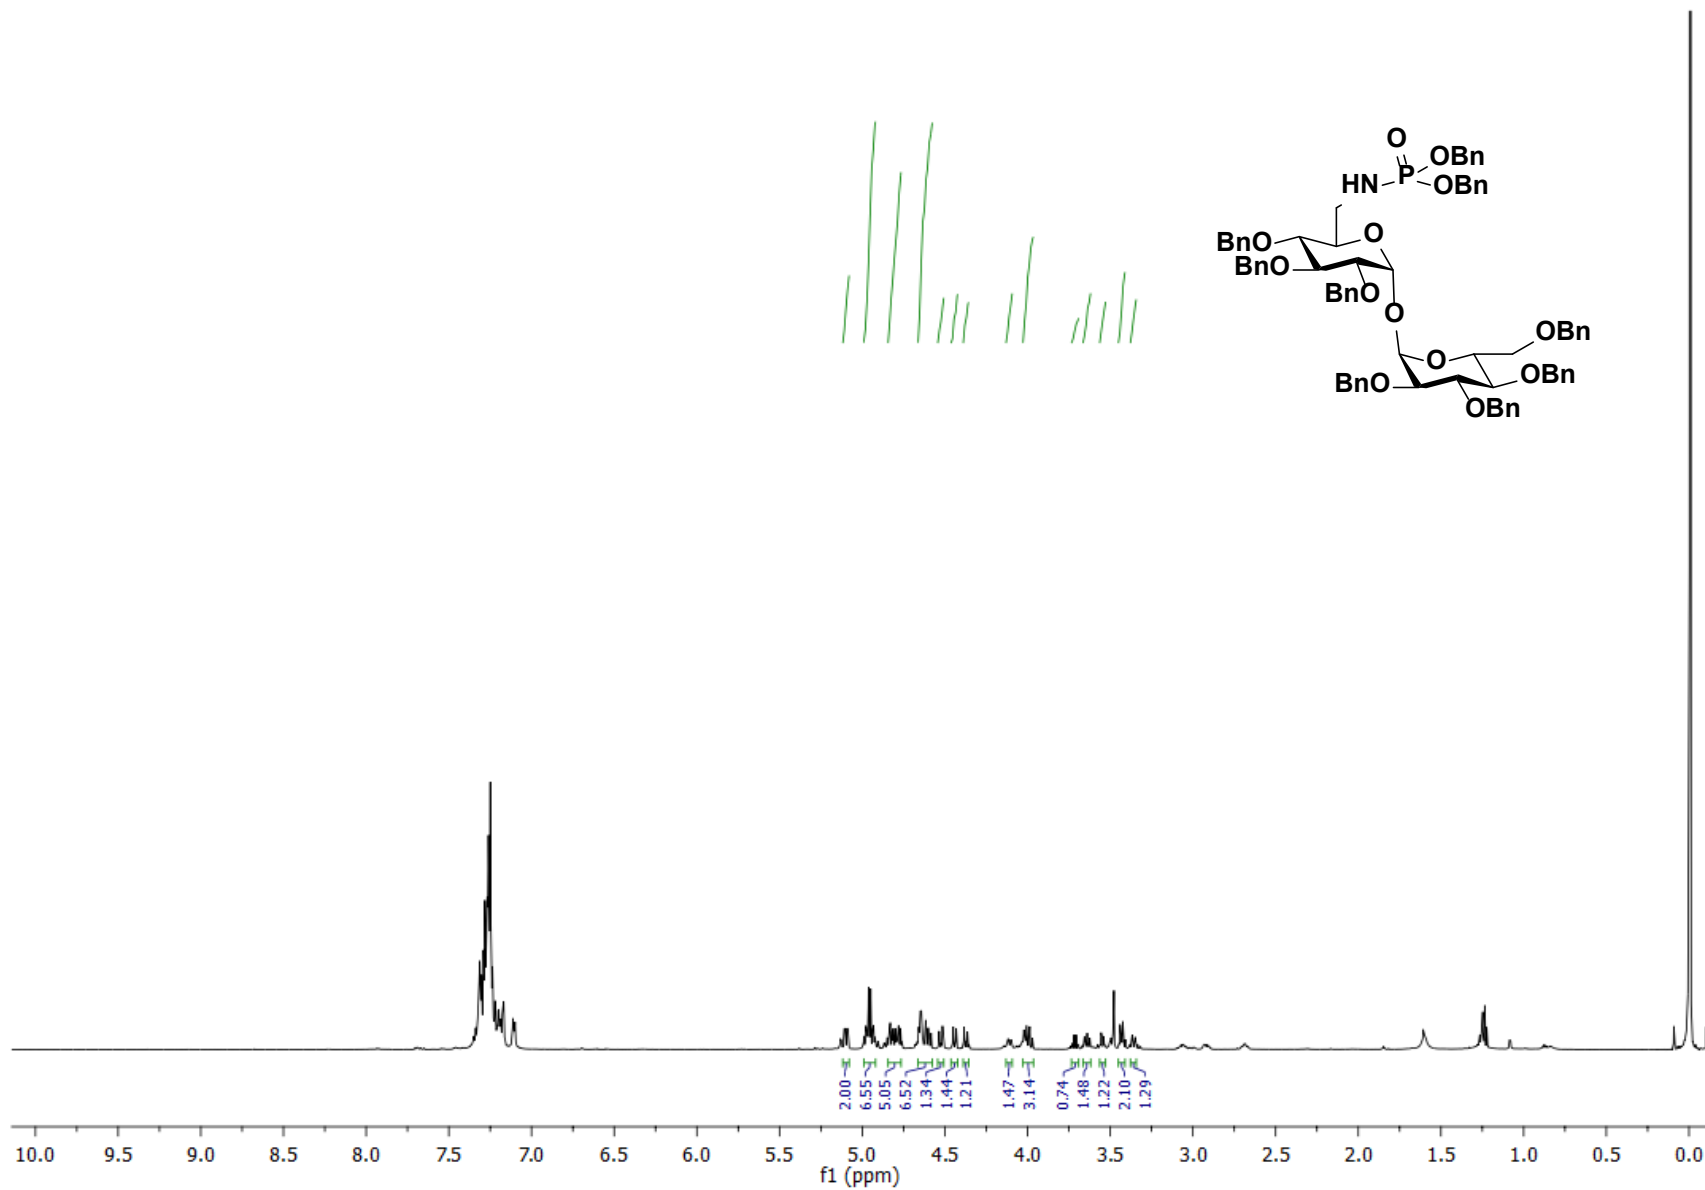



<sup>13</sup>C NMR 2,2',3,3',4,4',6'-Hepta-O-benzyl-6-Deoxy-6-dibenzylphosphoramidate)-α,α'-trehalose (17)

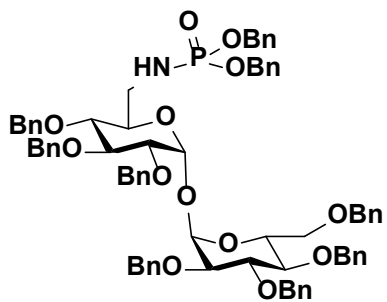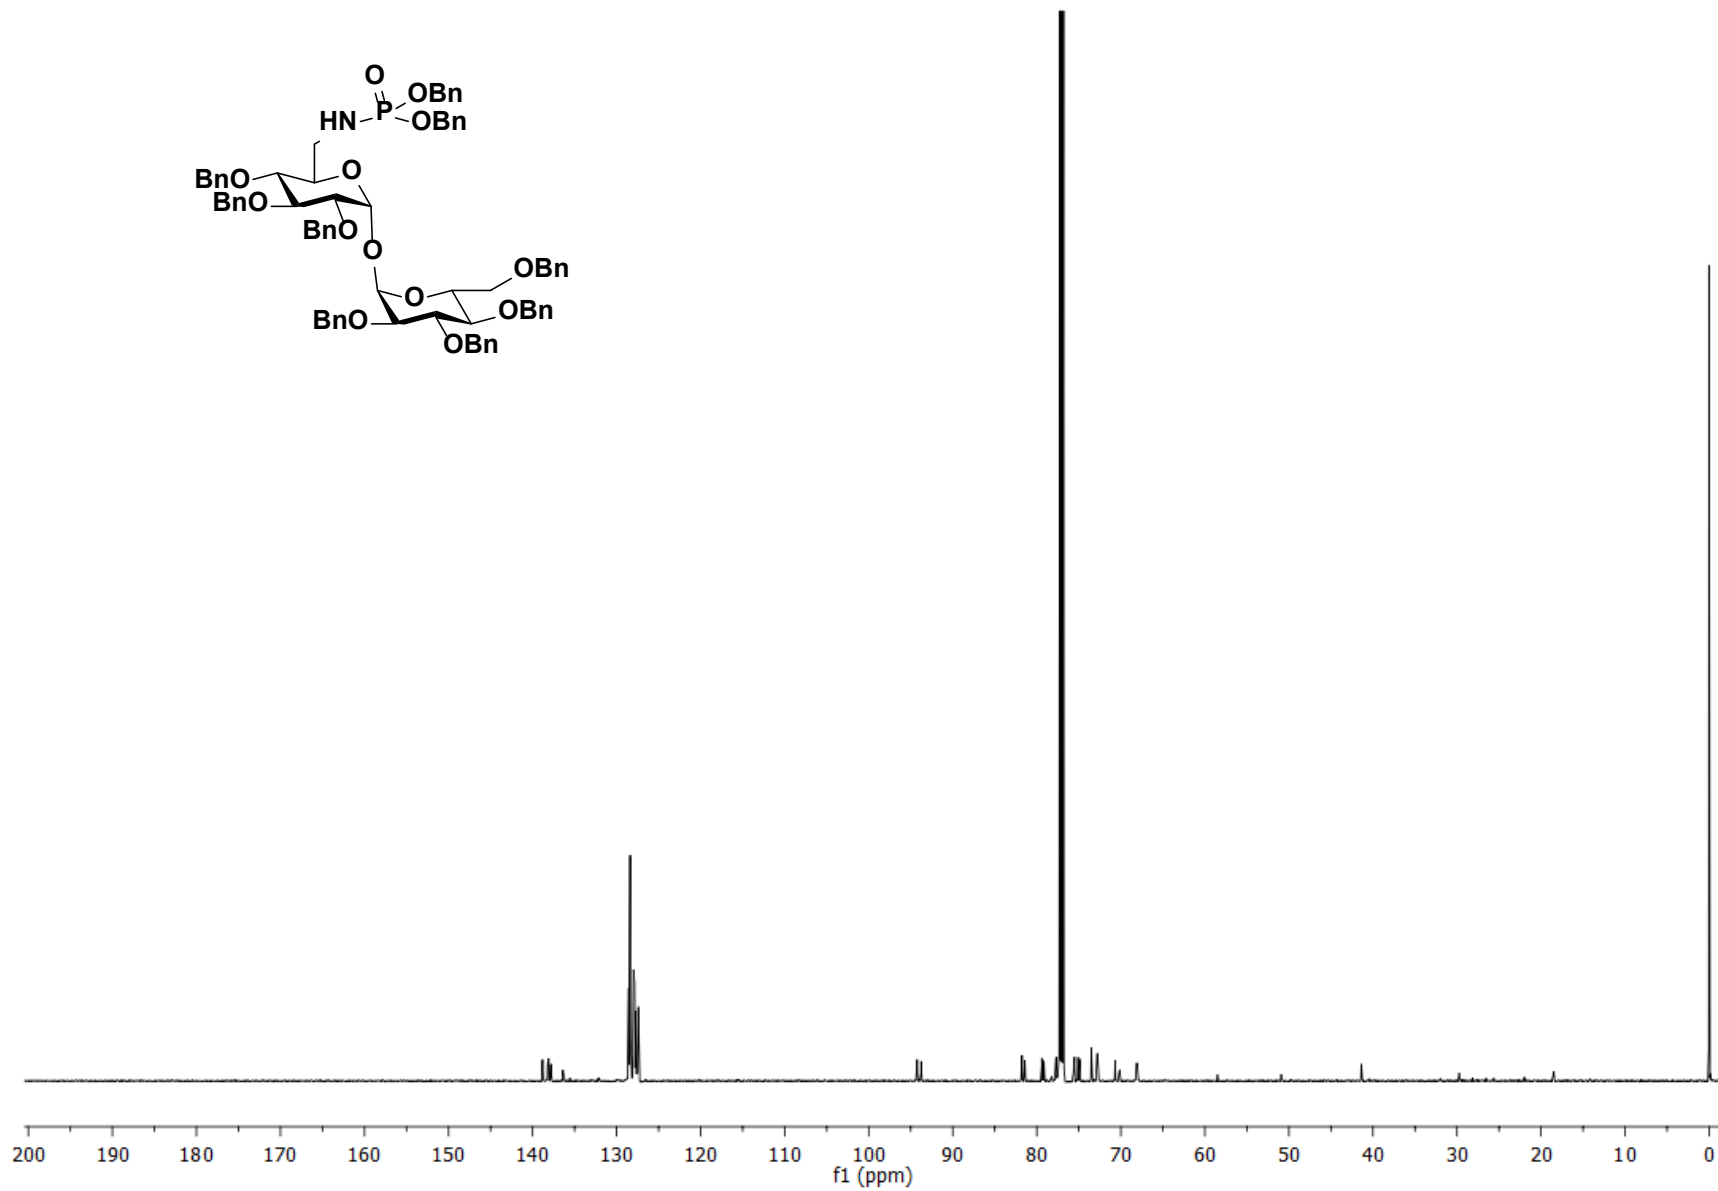

**$^{31}\text{P}$  2,2',3,3',4,4',6'-Hepta-O-benzyl-6-Deoxy-6-dibenzylphosphoramidate)- $\alpha,\alpha'$ -trehalose (17)**

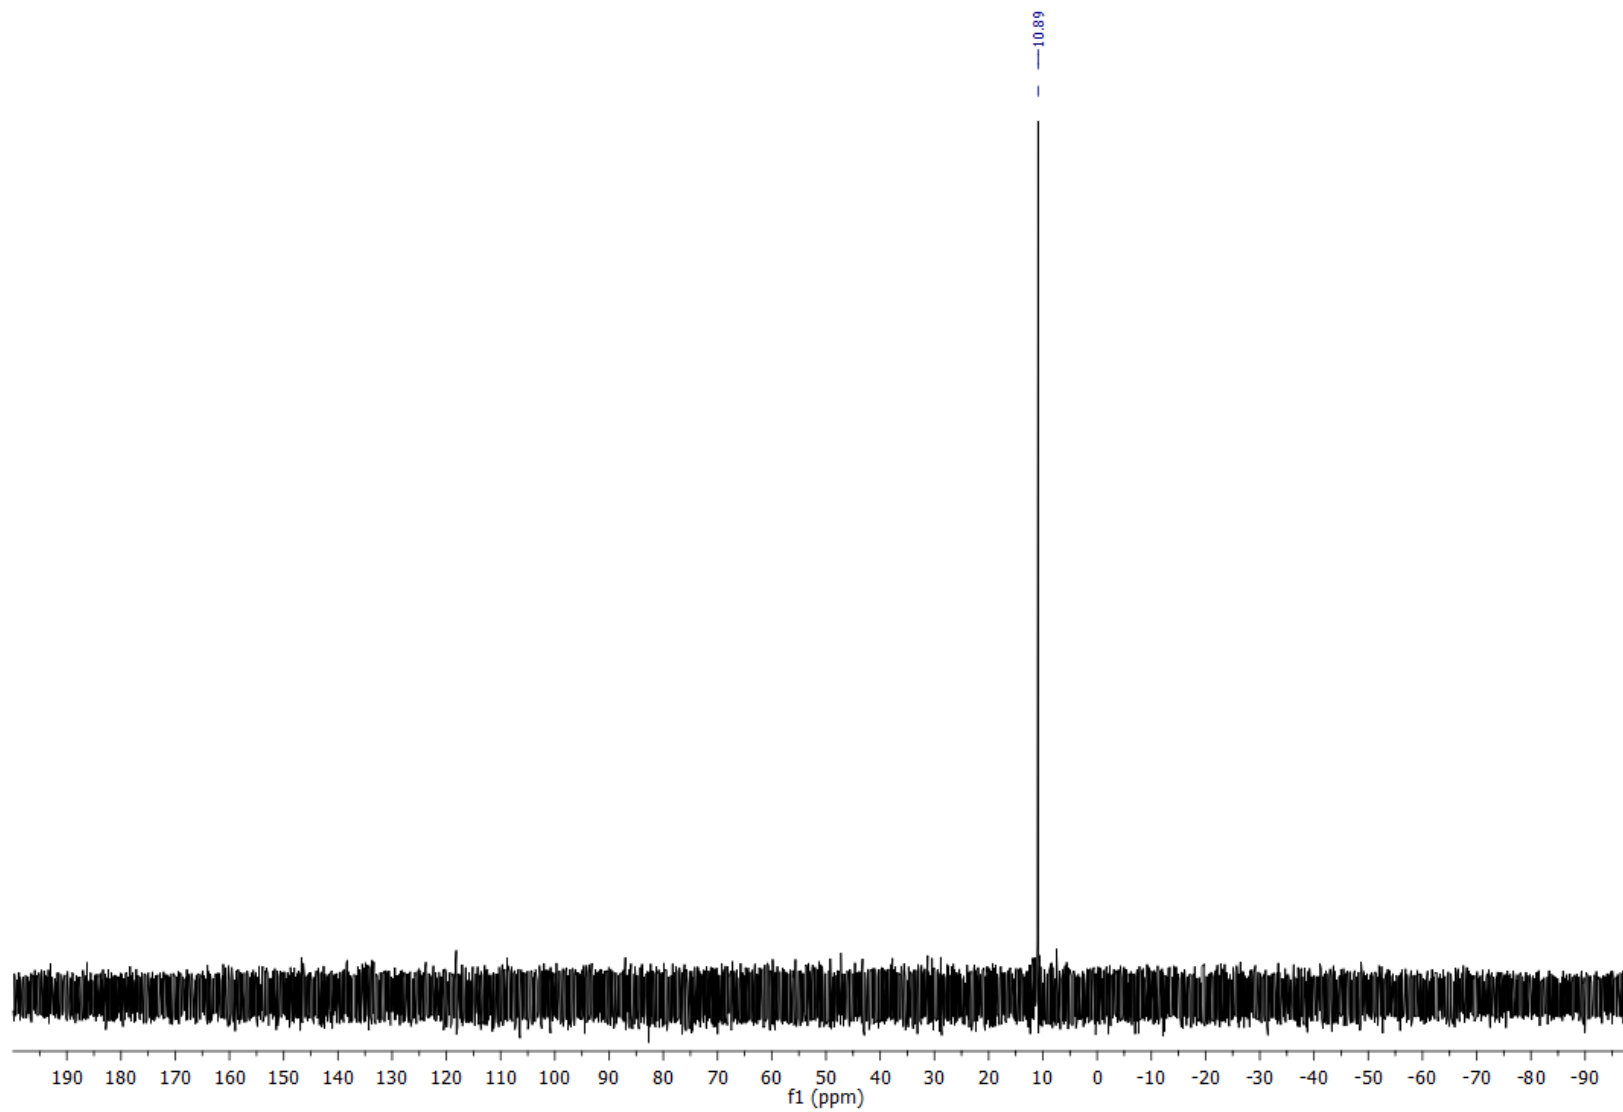

**<sup>1</sup>H NMR 6-(phosphoramidic acid)- $\alpha,\alpha'$ -trehalose (6)**

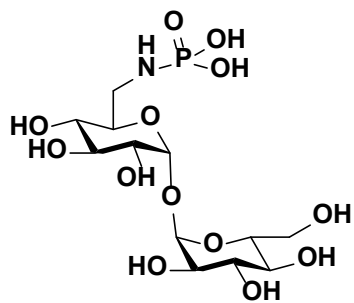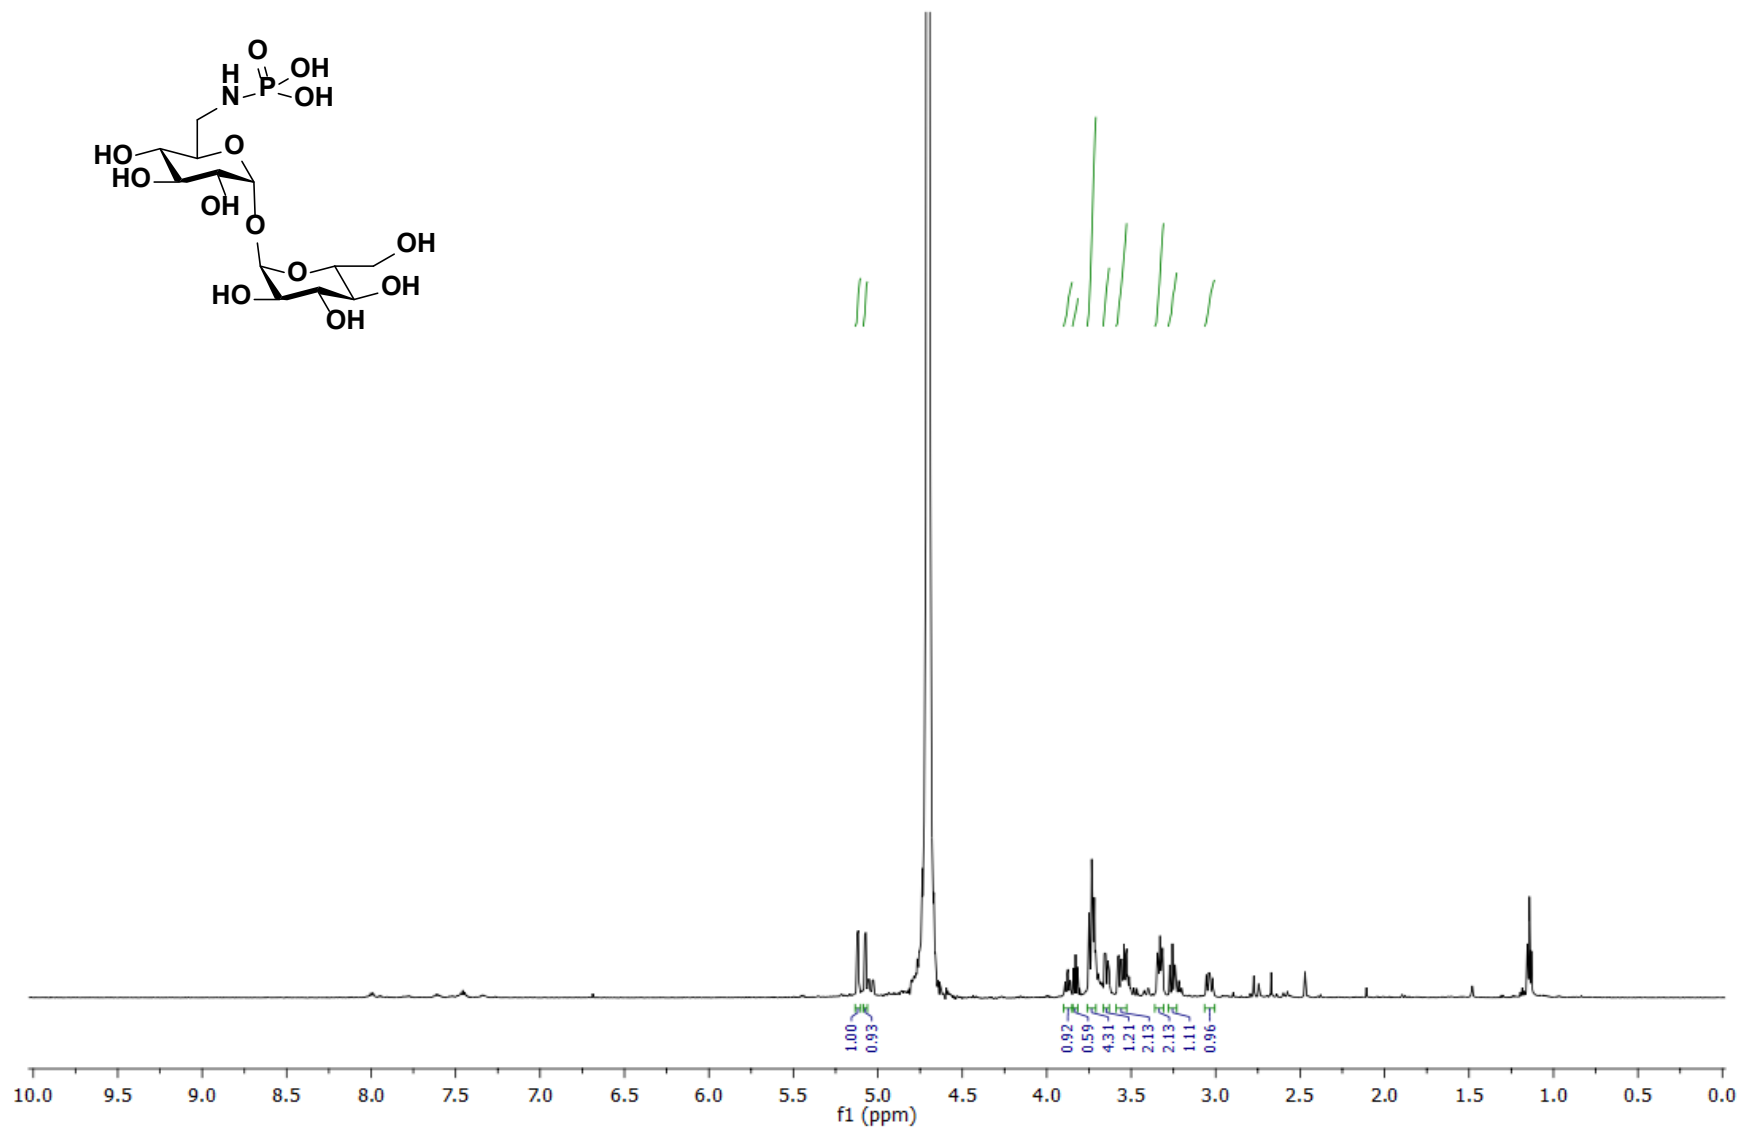

**<sup>13</sup>C NMR 6-(phosphoramidic acid)- $\alpha,\alpha'$ -trehalose (6)**

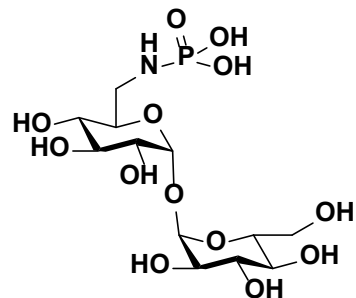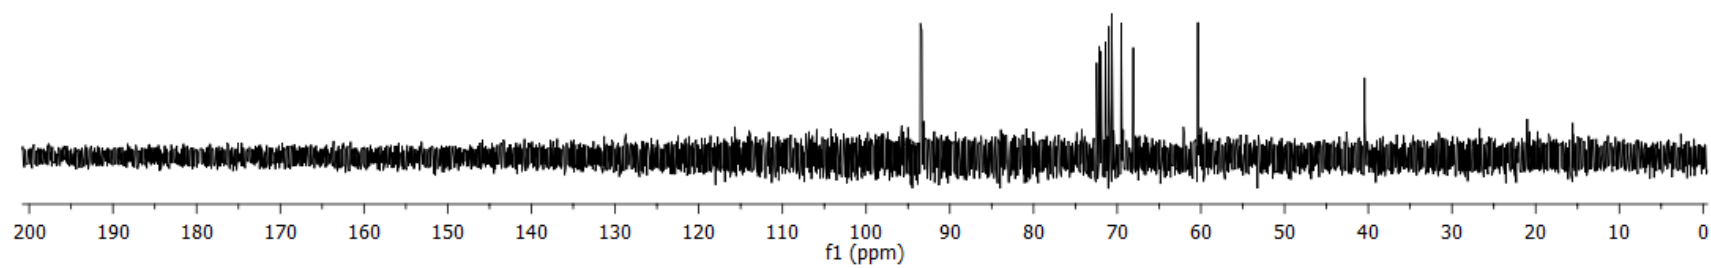

**$^{31}\text{P}$  NMR 6-(phosphoramidic acid)- $\alpha,\alpha'$ -trehalose (6)**

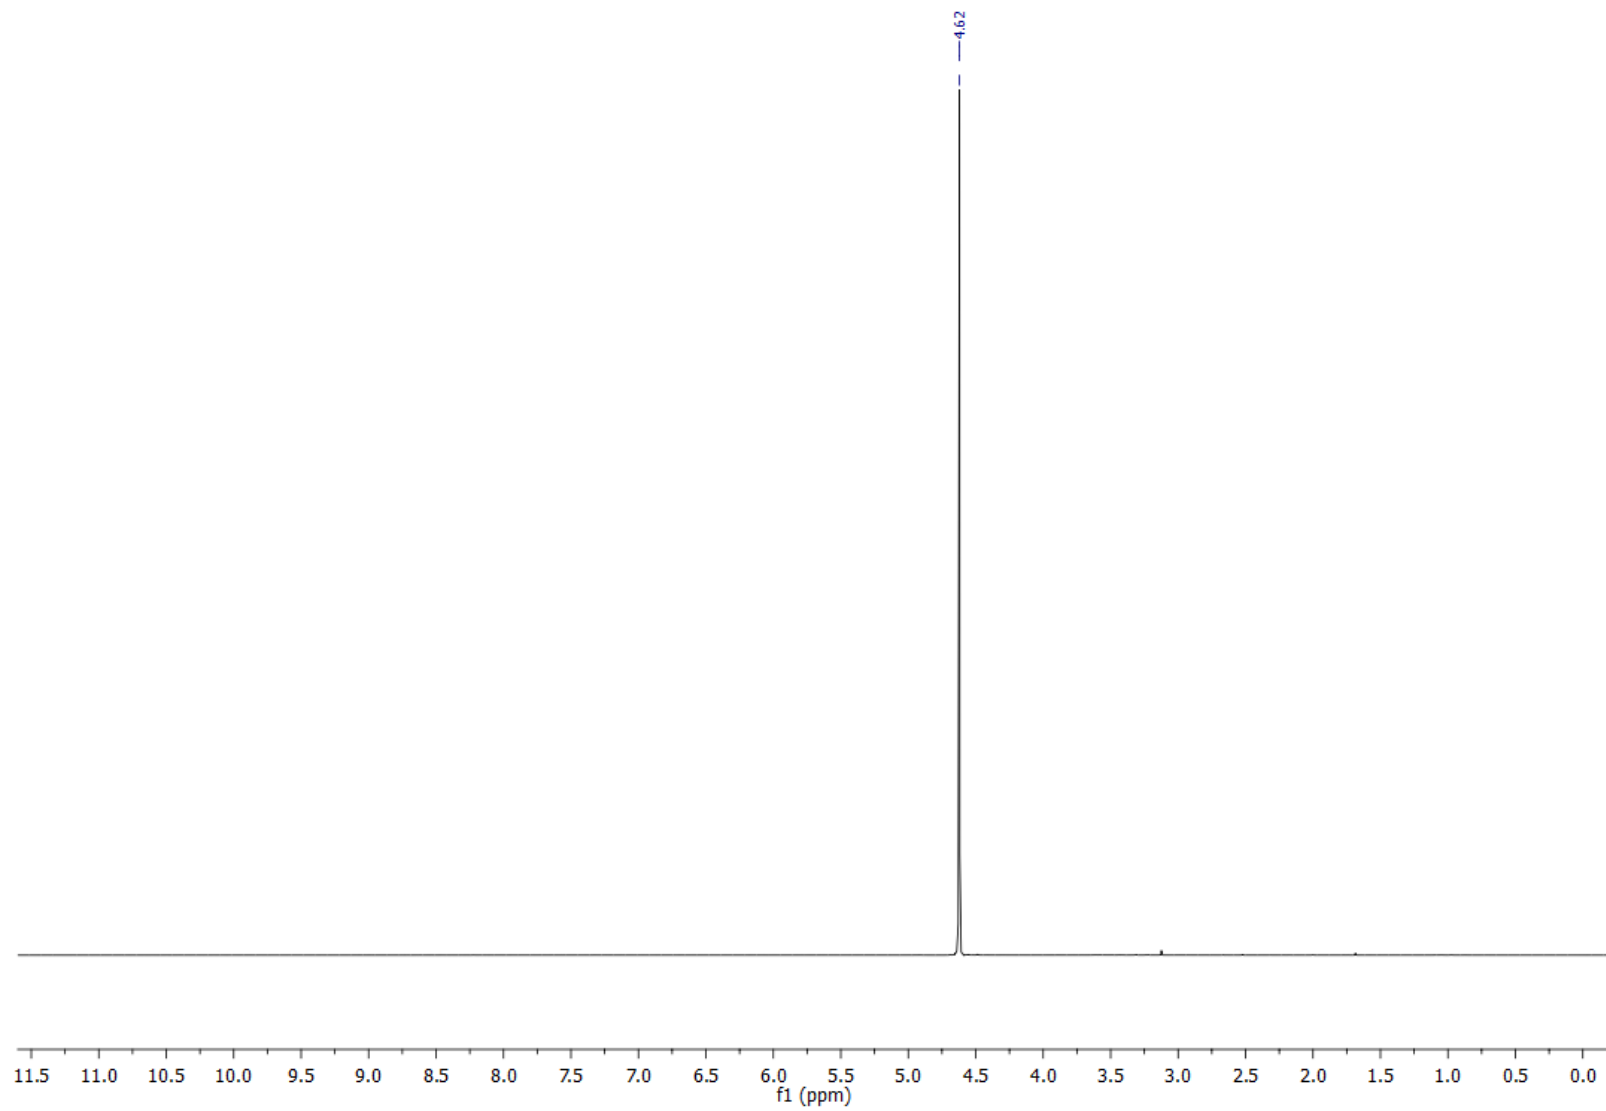

**<sup>1</sup>H NMR 2,2',3,3',4,4',6'-Hepta-O-benzyl-6-deoxy-6-ethynyl- $\alpha,\alpha'$ -trehalose (18)**

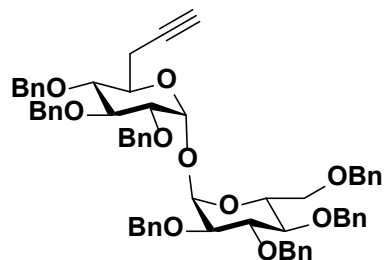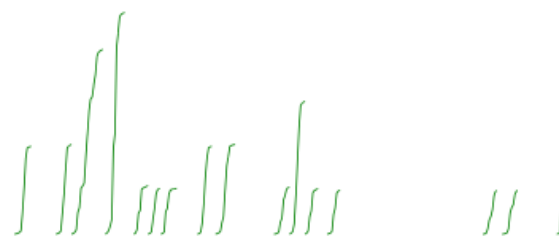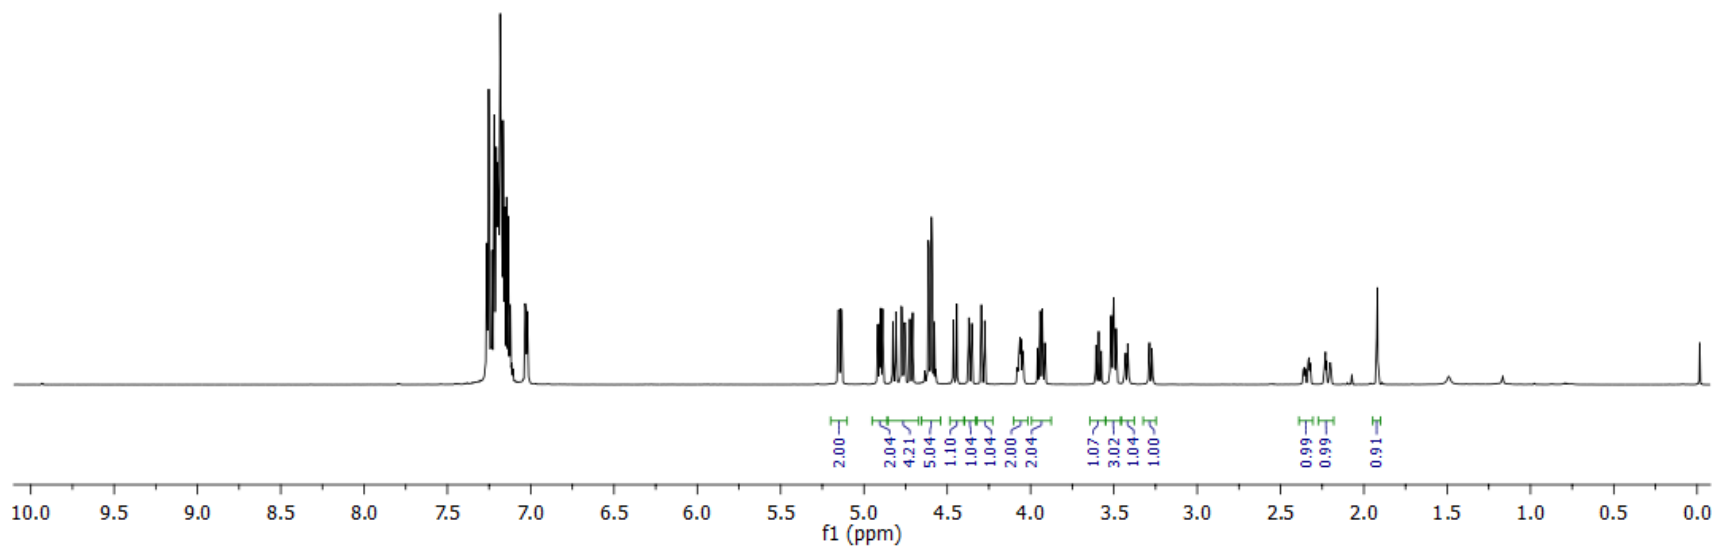

**$^{13}\text{C}$  NMR 2,2',3,3',4,4',6'-Hepta-O-benzyl-6-deoxy-6-ethynyl- $\alpha,\alpha'$ -trehalose (18)**

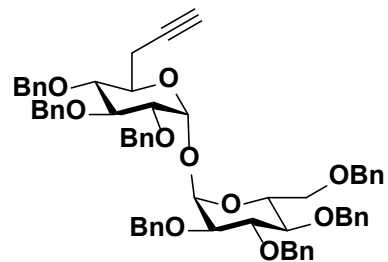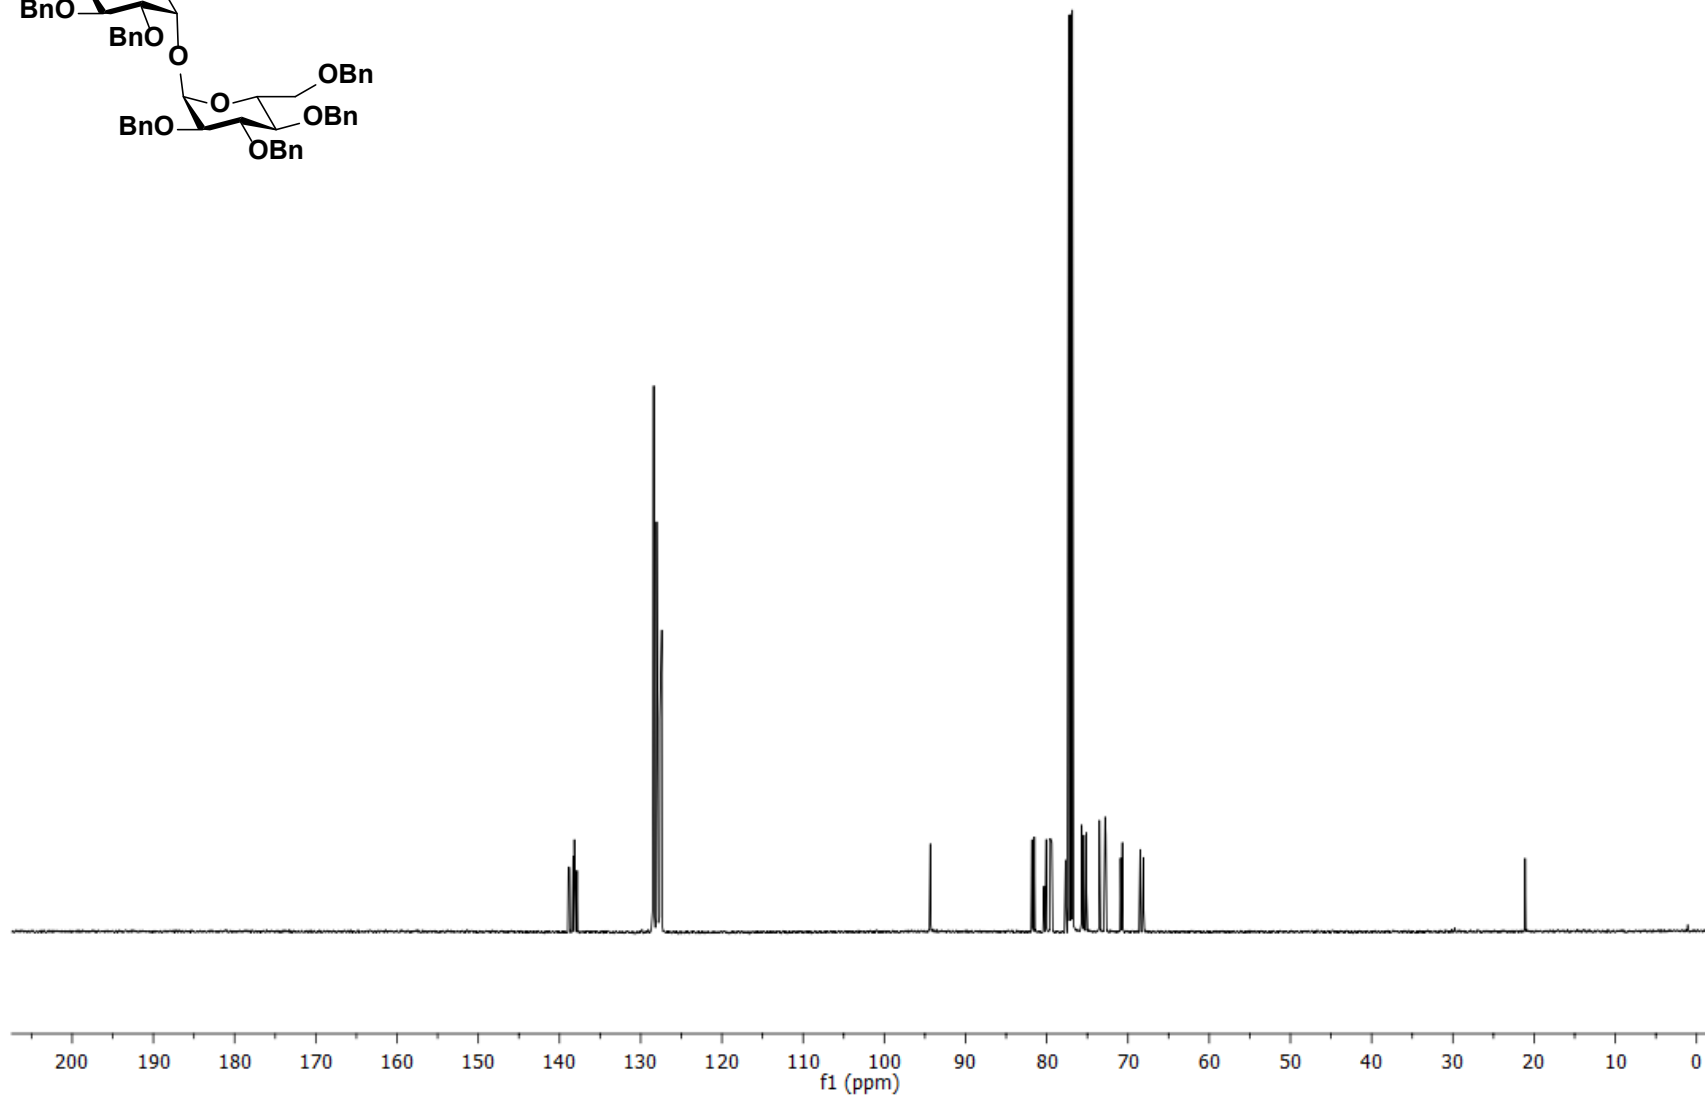

**<sup>1</sup>H NMR 2,2',3,3',4,4',6'-Hepta-O-acetyl-6-Deoxy-6-vinyl- $\alpha,\alpha'$ -trehalose (19)**

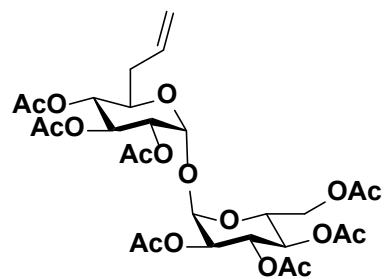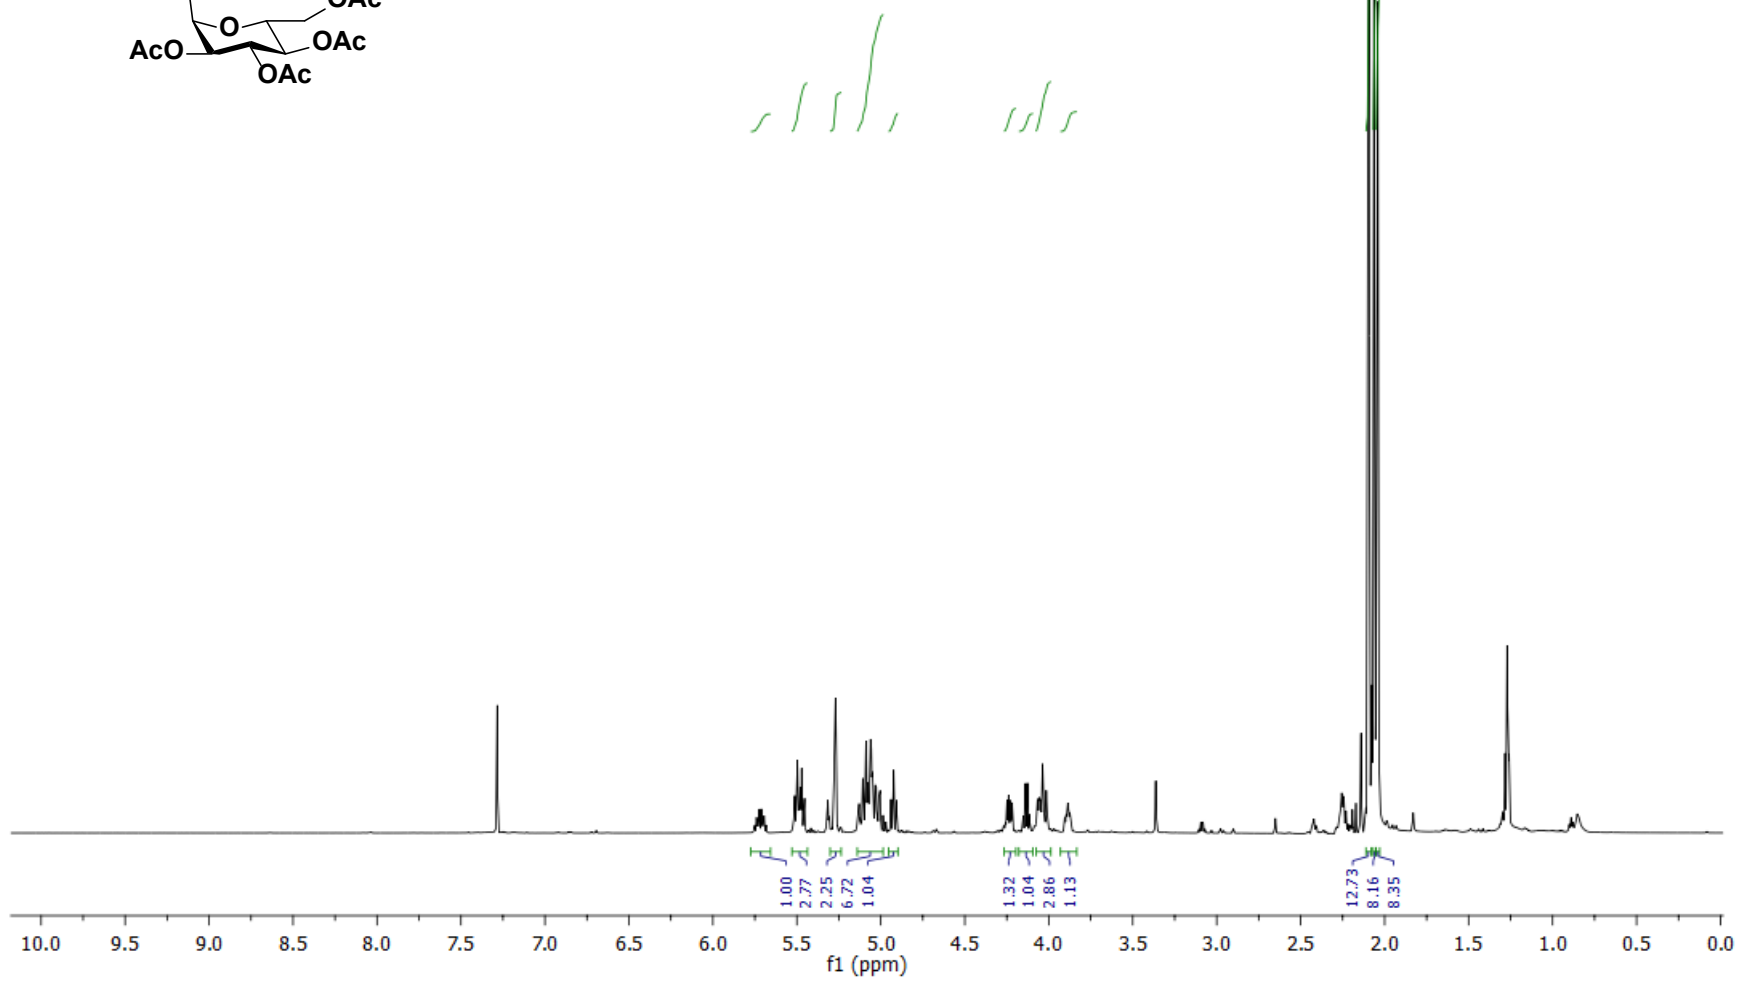



<sup>13</sup>C NMR 2,2',3,3',4,4',6'-Hepta-O-acetyl-6-Deoxy-6-vinyl- $\alpha,\alpha'$ -trehalose (19)

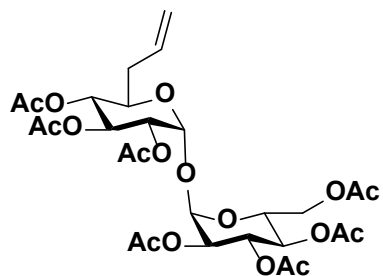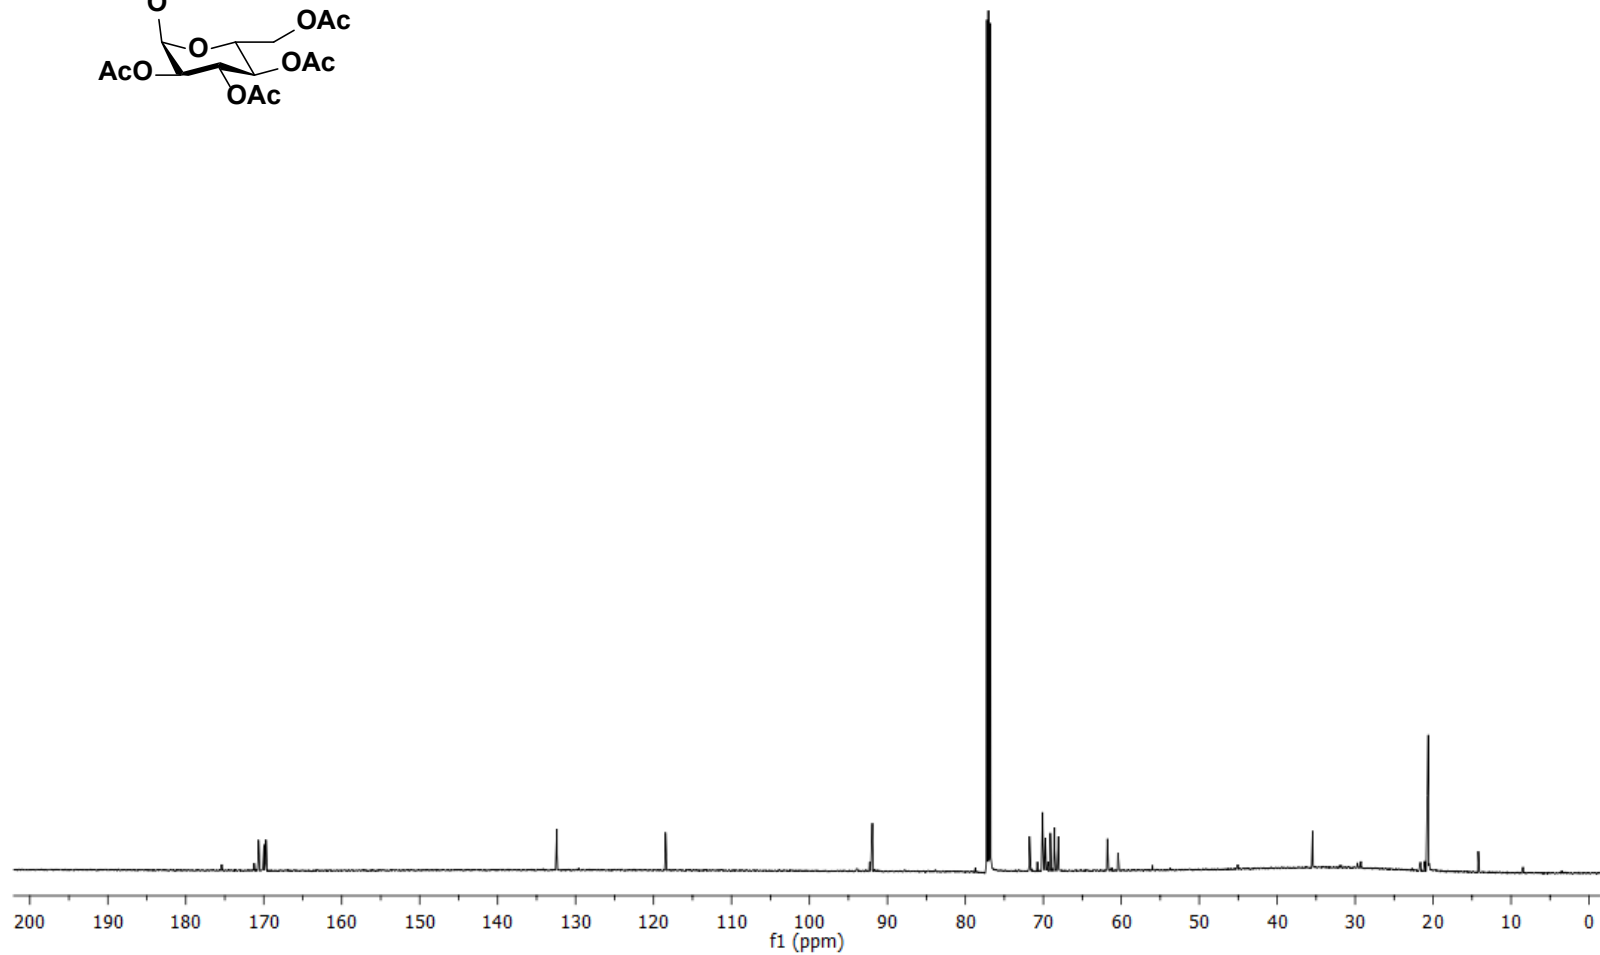

**<sup>1</sup>H NMR 2,2',3,3',4,4',6'-Hepta-O-acetyl-6-Deoxy-6-oxiranyl- $\alpha,\alpha'$ -trehalose (20)**

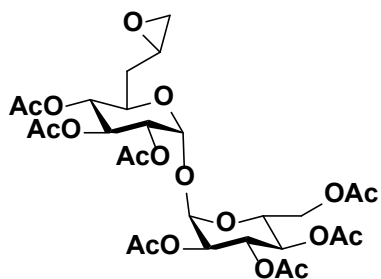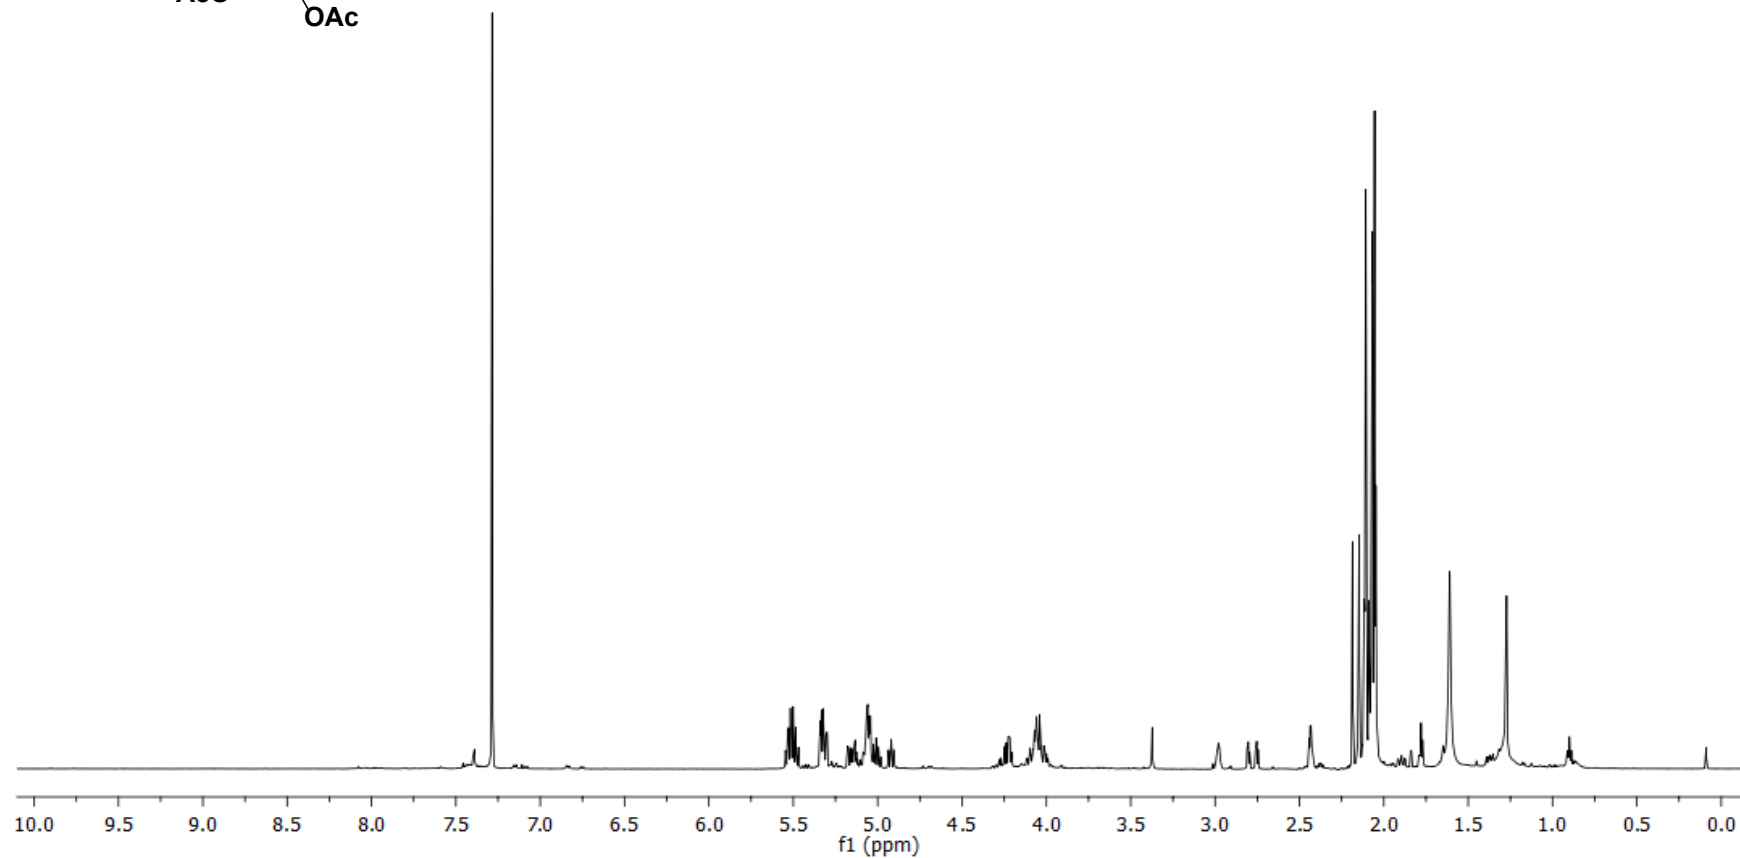

<sup>13</sup>C NMR 2,2',3,3',4,4',6'-Hepta-O-acetyl-6-Deoxy-6-oxiranyl- $\alpha,\alpha'$ -trehalose (20)

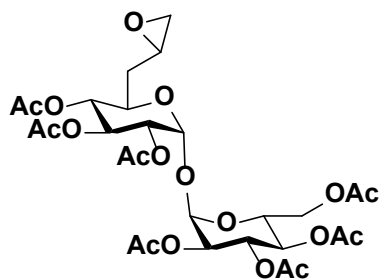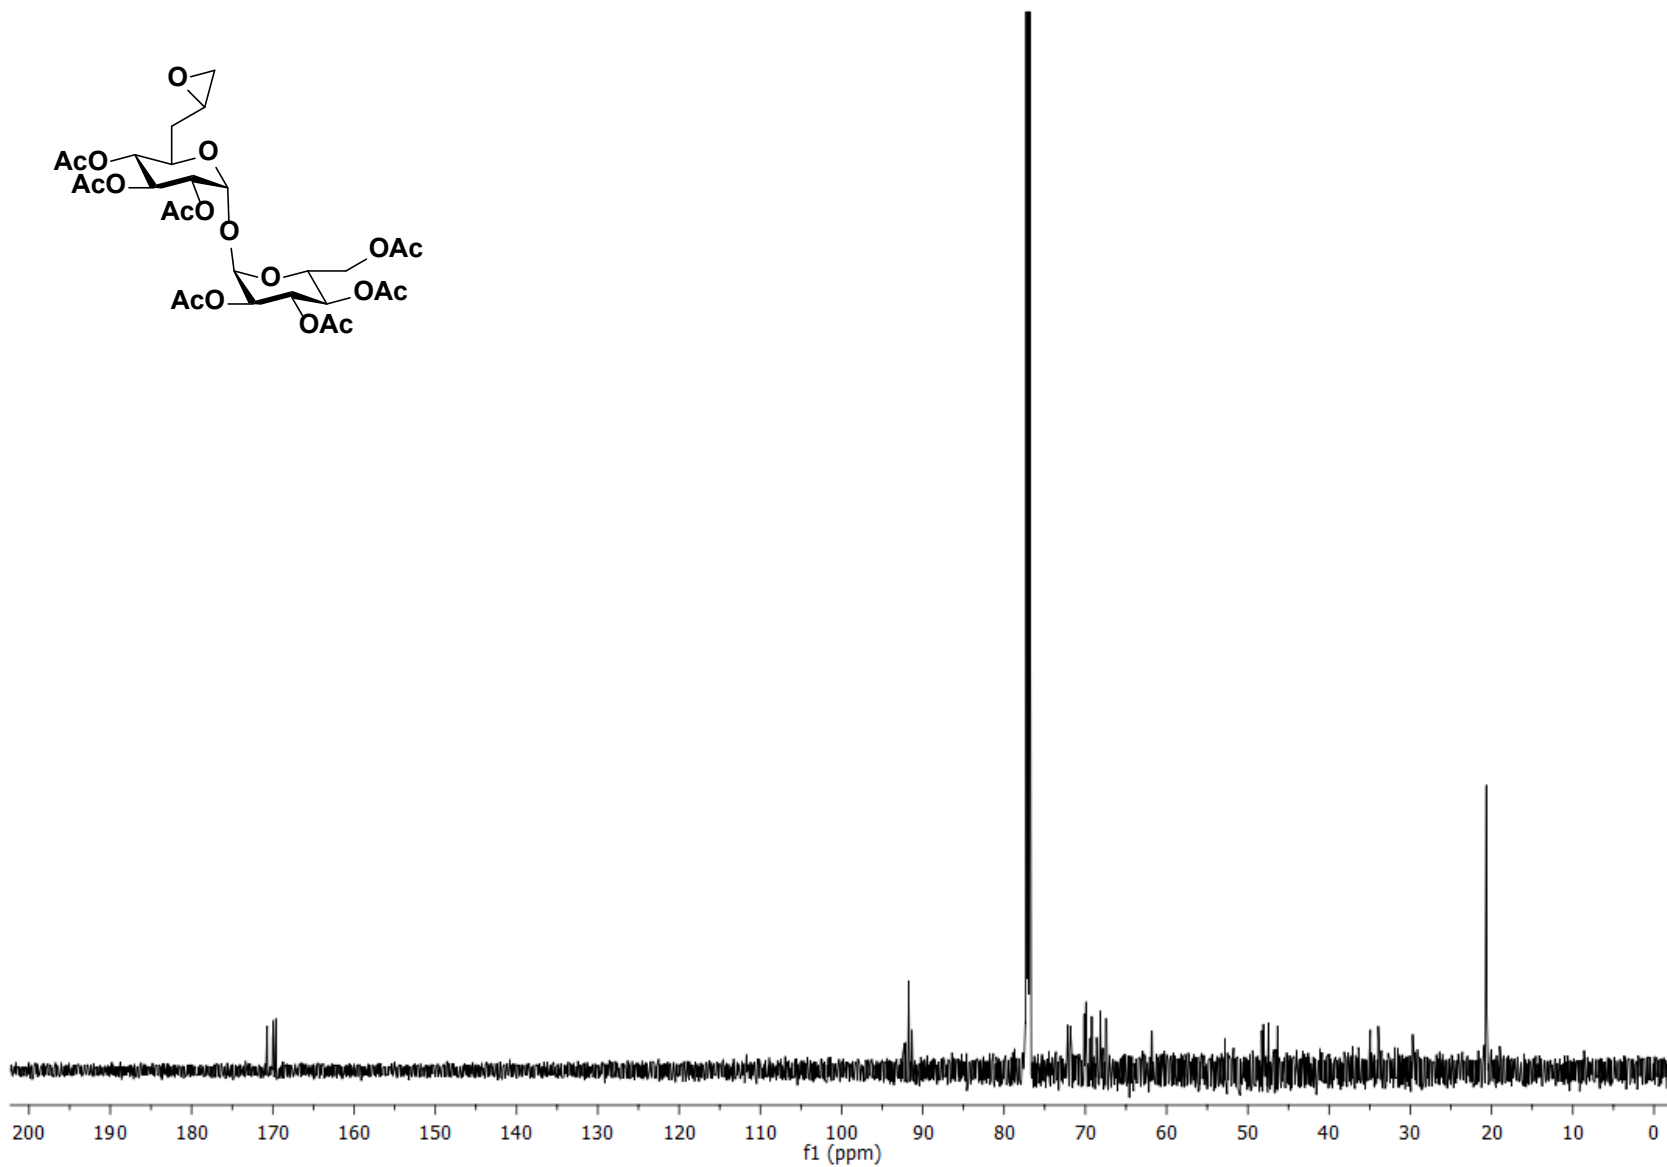

**<sup>1</sup>H NMR 6-Deoxy-6-oxiranyl- $\alpha,\alpha'$ -trehalose (7)**

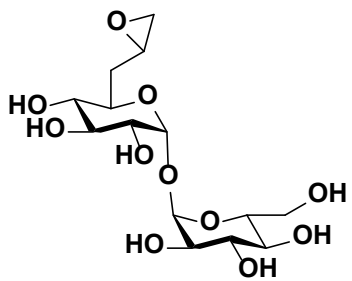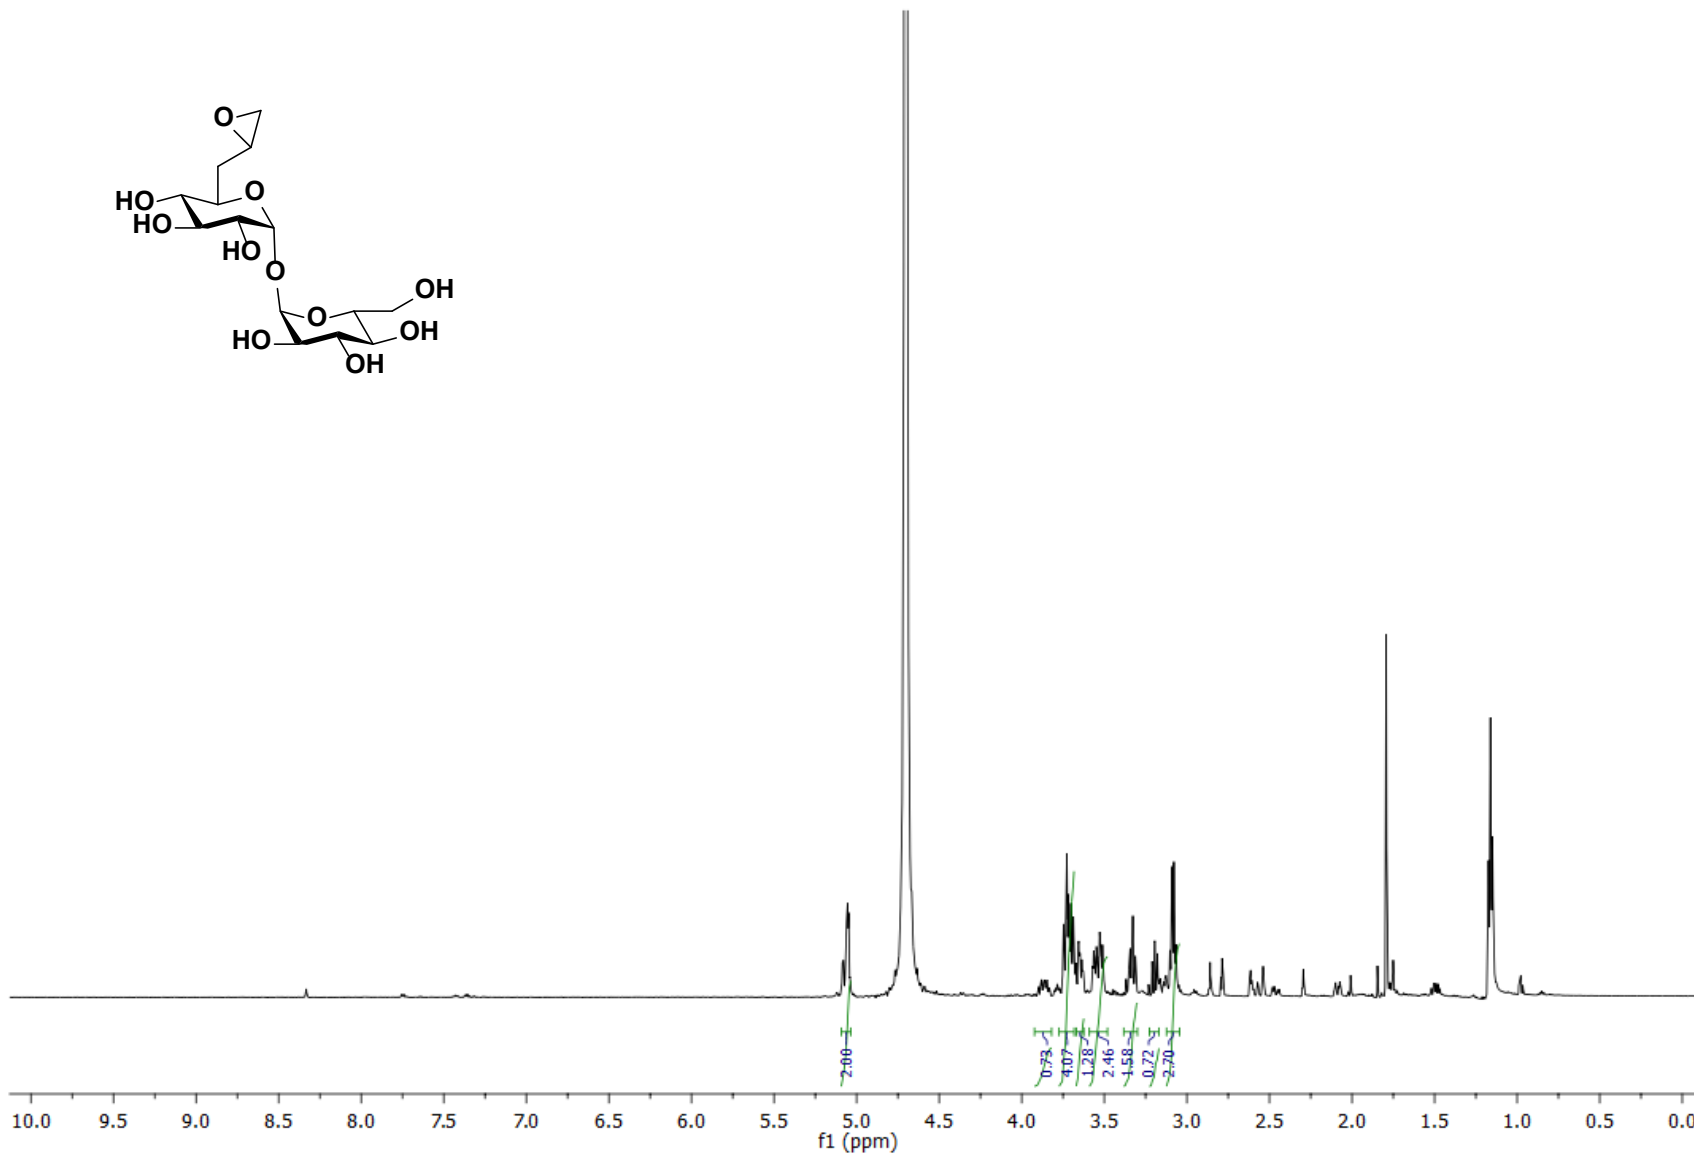

**<sup>13</sup>C NMR 6-Deoxy-6-oxiranyl- $\alpha,\alpha'$ -trehalose (7)**

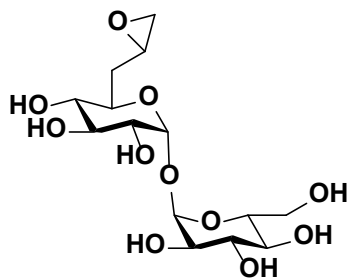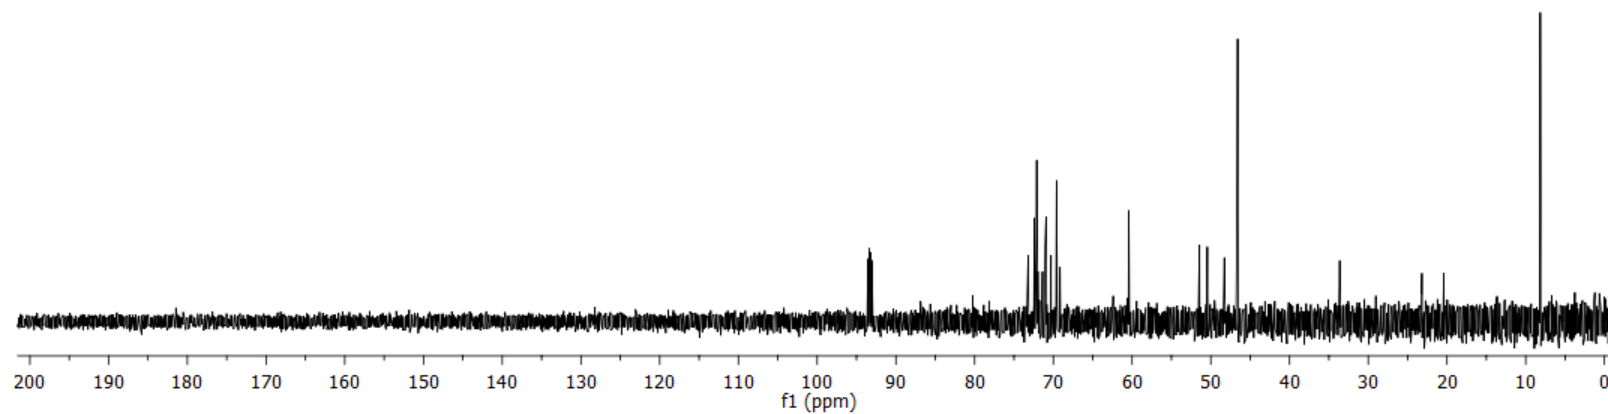

Supplement: NIHMS1019427-supplement-Supp_info.pdf [file NIHMS1019427-supplement-Supp_info.pdf]
